# Supplementary material for: Genome-wide association study identifies ZmMYB42 as a candidate gene for resistance to maize head smut
Source: Research Square preprint supplement (doi:10.21203/rs.3.rs-5898765/v1), 2025-04-23
Supplement: Supplementary file 1 [file 18538d95ee076d4b27e749b9.docx]

Fig S3. Specific primer SR3 test for the *S. reilianum* genome. (a) Detection of *S. reilianum* successfully infested with Huangzao4; (b) Detection of *S. reilianum* successfully infested with Chang7-2; (c) Detection of *S. reilianum* successfully infested with Ji1037; (d) Detection of *S. reilianum* successfully infested with Mo17. M: 2K Marker; P: Positive control; W: Blank control
