# Supplementary material for: Genome-wide association study identifies ZmMYB42 as a candidate gene for resistance to maize head smut
Source: Research Square preprint supplement (doi:10.21203/rs.3.rs-5898765/v1), 2025-04-23
Supplement: Supplementary file 2 [file 48140f2b4ac0117fdb898b81.xlsx]

## Sheet: Sheet1
	Table S3 Descriptive statistics for head smut incidence within the two years
	Year	n	Mean	SD	Range	Skewness	Kurtosi	Heritability
head smut incidence	2022	292	0.106	0.124	0-0.690	2.043	4.370	0.906
head smut incidence	2023	292	0.193	0.190	0-0.989	1.615	2.905	0.998
Average head smut incidence	2022 and 2023	292	0.152	0.151	0-0.840	1.662	2.987	0.986
