# Supplementary material for: Genome-wide association study identifies ZmMYB42 as a candidate gene for resistance to maize head smut
Source: Research Square preprint supplement (doi:10.21203/rs.3.rs-5898765/v1), 2025-04-23
Supplement: Supplementary file 3 [file 51f5637d5a927fb691decd58.xlsx]

## Sheet: Sheet1
Table S7 Information about MYB transcription factors in maize from the NCBI database
Gene name	Code	Species
XP008681372.1	uncharacterized isoform X2	Zea mays
XP008681373.1	uncharacterized isoform X3	Zea mays
NP001140392.1	uncharacterized LOC100272446	Zea mays
XP008681371.1	uncharacterized isoform X1	Zea mays
XP008681374.1	uncharacterized isoform X4	Zea mays
XP008648940.1	myb-like DNA-binding protein myb-1	Zea mays
XP008665006.1	transcription factor MYB120	Zea mays
XP008681539.1	uncharacterized isoform X1	Zea mays
NP001142050.1	uncharacterized LOC100274206	Zea mays
NP001130632.1	MYBGA transcription factor	Zea mays
XP008672038.1	MYBGA transcription factor isoform X1	Zea mays
XP035817398.1	transcription factor GAMYB isoform X2	Zea mays
XP035817399.1	transcription factor GAMYB isoform X2	Zea mays
NP001241838.2	transcription factor GAMYB	Zea mays
XP035817396.1	transcription factor GAMYB isoform X1	Zea mays
XP020397769.1	transcription factor GAMYB isoform X1	Zea mays
XP035817397.1	transcription factor GAMYB isoform X1	Zea mays
NP001169723.1	uncharacterized LOC100383604	Zea mays
XP008648126.1	uncharacterized isoform X1	Zea mays
NP001141727.1	uncharacterized LOC100273858	Zea mays
XP008647571.1	uncharacterized isoform X1	Zea mays
XP020399944.1	transcription factor MYB29	Zea mays
XP020399954.1	transcription factor MYB29	Zea mays
XP008659753.1	transcription factor MYB3R-2	Zea mays
XP020401716.1	transcription factor MYB2	Zea mays
XP008645936.1	myb-related protein 308	Zea mays
XP008650938.1	transcription factor MYB2	Zea mays
XP035818152.1	uncharacterized isoform X1	Zea mays
NP001148697.1	uncharacterized LOC100282313	Zea mays
XP035816462.1	transcription factor MYB94 isoform X1	Zea mays
XP035819620.1	transcription factor MYB60-like	Zea mays
XP008662386.1	transcription factor MYB60	Zea mays
XP035819578.1	transcription factor MYB30-like	Zea mays
XP008679379.1	transcription factor MYB60	Zea mays
NP001358032.1	Transcription factor MYB30-like	Zea mays
NP001170619.1	uncharacterized LOC100384664	Zea mays
NP001150967.1	Transcription factor MYB96	Zea mays
NP001358784.1	Transcription factor MYB94	Zea mays
NP001149309.1	Myb-related protein 306	Zea mays
NP001132068.2	Myb-related protein 306	Zea mays
XP008664657.1	myb-related protein 306	Zea mays
NP001335502.1	myb-related protein 306	Zea mays
XP008652703.1	myb-related protein 306	Zea mays
NP001132897.1	Myb-related protein MYBAS2	Zea mays
XP008664606.1	myb-related protein MYBAS2 isoform X3	Zea mays
XP008664602.1	myb-related protein MYBAS2 isoform X2	Zea mays
XP008664593.1	myb-related protein MYBAS2 isoform X1	Zea mays
NP001140590.1	MYB transcription factor	Zea mays
XP008672361.1	MYB transcription factor isoform X2	Zea mays
XP008672360.1	MYB transcription factor isoform X1	Zea mays
XP035822828.1	MYB59 isoform X1	Zea mays
NP001149882.1	MYB59	Zea mays
NP001309882.1	Transcription factor MYB48	Zea mays
NP001340477.1	uncharacterized protein LOC100272853 isoform 2	Zea mays
XP008675301.1	myb-related protein 305	Zea mays
NP001334575.1	uncharacterized protein LOC100193925	Zea mays
NP001141174.1	MYB transcription factor	Zea mays
NP001170329.1	Transcription factor JAMYB	Zea mays
XP008674336.1	transcription factor JAMYB	Zea mays
NP001337742.1	Transcription factor JAMYB-like	Zea mays
NP001131296.1	Transcription factor MYB2	Zea mays
XP008667098.1	transcription factor MYB2 isoform X1	Zea mays
NP001140397.1	Transcription factor MYB2	Zea mays
NP001141891.1	Transcription factor MYB2	Zea mays
NP001152038.1	uncharacterized protein LOC100285675	Zea mays
XP008655821.1	transcription factor JAMYB	Zea mays
XP020398348.1	transcription factor MYB2	Zea mays
XP008662919.1	transcription factor MYB2	Zea mays
NP001182983.1	Transcription factor MYB2	Zea mays
XP020397823.1	transcription factor MYB3R-2-like isoform X1	Zea mays
XP020397825.1	transcription factor MYB3R-2-like isoform X3	Zea mays
XP020397824.1	transcription factor MYB3R-2-like isoform X2	Zea mays
NP001168959.1	Transcription factor MYB3R-2-like	Zea mays
XP020397826.1	transcription factor MYB3R-2-like isoform X4	Zea mays
XP020405376.1	transcription factor MYB3R-2 isoform X1	Zea mays
NP001151448.1	Transcription factor MYB3R-2	Zea mays
XP008672992.1	transcription factor MYB3R-2 isoform X1	Zea mays
XP035821809.1	transcription factor MYB3R-2 isoform X1	Zea mays
XP008649477.1	transcription factor MYB3R-4 isoform X1	Zea mays
XP008649478.1	transcription factor MYB3R-4 isoform X1	Zea mays
XP008649480.1	transcription factor MYB3R-4 isoform X3	Zea mays
XP008649479.1	transcription factor MYB3R-4 isoform X2	Zea mays
XP008673353.1	uncharacterized protein	Zea mays
XP035821922.1	uncharacterized protein	Zea mays
NP001310566.1	uncharacterized protein LOC100502241	Zea mays
XP008673352.1	uncharacterized protein	Zea mays
XP035816686.1	uncharacterized protein	Zea mays
NP001358546.1	myb2	Zea mays
XP023155952.1	uncharacterized protein	Zea mays
XP008645508.1	uncharacterized protein	Zea mays
XP008645507.1	uncharacterized protein	Zea mays
XP008645509.1	uncharacterized protein	Zea mays
XP008645504.1	uncharacterized protein	Zea mays
XP008645505.1	uncharacterized protein	Zea mays
XP008645512.1	transcription factor MYB3R-5 isoform X6	Zea mays
XP008645503.1	uncharacterized protein	Zea mays
XP008668294.1	uncharacterized protein	Zea mays
NP001348476.1	uncharacterized protein LOC100381853	Zea mays
XP008675346.1	MYB-like transcription factor ETC3	Zea mays
NP001105509.1	protein rough sheath 2	Zea mays
NP001167937.1	uncharacterized LOC100381651	Zea mays
NP001132209.1	MYB-type transcription factor	Zea mays
XP020393188.2	LOW QUALITY PROTEIN: transcription factor MYB115	Zea mays
NP001337122.1	Transcription factor MYB98	Zea mays
NP001159044.1	Transcription factor MYB44	Zea mays
NP001132112.2	Transcription factor MYB44	Zea mays
NP001147631.1	Transcription factor MYB44	Zea mays
NP001151336.1	sucrose responsive element binding protein	Zea mays
NP001183628.1	Transcription factor MYB44	Zea mays
NP001141619.2	MYB transcription factor	Zea mays
XP008674458.1	transcription factor MYB77	Zea mays
XP008649548.1	transcription factor MYB77	Zea mays
NP001168553.1	uncharacterized LOC100382333	Zea mays
XP008649550.1	transcription factor MYB77	Zea mays
XP020401111.1	probable transcription factor MYB58	Zea mays
XP020405410.1	MYB transcription factor isoform X1	Zea mays
NP001167788.1	MYB transcription factor	Zea mays
NP001344652.1	Transcription factor CSA	Zea mays
XP008673911.1	transcription factor CSA	Zea mays
NP001354272.1	Transcription factor CSA	Zea mays
XP008644559.1	transcription factor MYB54 isoform X1	Zea mays
XP008644560.1	transcription factor MYB54 isoform X2	Zea mays
XP008644561.1	transcription factor MYB52 isoform X3	Zea mays
XP008665319.1	transcription factor MYB54	Zea mays
NP001151853.1	uncharacterized LOC100285488	Zea mays
XP020407261.1	myb domain protein 69 isoform X1	Zea mays
NP001169060.1	myb domain protein 69	Zea mays
XP008668308.2	uncharacterized isoform X2	Zea mays
XP008668307.2	uncharacterized isoform X1	Zea mays
XP020393544.1	LOW QUALITY PROTEIN: transcription factor MYB30	Zea mays
NP001142129.1	uncharacterized protein LOC100274293	Zea mays
XP008658316.1	uncharacterized protein	Zea mays
NP001150470.1	Transcription factor MYB35	Zea mays
NP001146260.1	Transcription factor MYB80	Zea mays
XP020406077.1	transcription factor MYB1 isoform X1	Zea mays
XP008675095.1	transcription factor MYB30 isoform X2	Zea mays
XP008657851.1	transcription factor RAX2	Zea mays
XP008673589.1	transcription factor RAX2	Zea mays
XP008656763.1	transcription factor MYB4	Zea mays
XP008675187.1	transcription factor MYB4	Zea mays
NP001140362.1	uncharacterized protein LOC100272412	Zea mays
XP008670028.1	transcription factor MYB36	Zea mays
XP020403942.1	transcription factor RAX2	Zea mays
XP020393436.1	transcription factor MYB2 isoform X1	Zea mays
XP008644462.1	transcription factor MYB15 isoform X2	Zea mays
XP020402564.1	transcription factor RAX3	Zea mays
XP008646370.1	transcription factor MYB36	Zea mays
XP008679236.1	transcription factor MYB96	Zea mays
XP008678522.1	transcription factor MYB36	Zea mays
XP008670209.1	transcription factor MYB36	Zea mays
XP008651653.1	uncharacterized isoform X2	Zea mays
NP001168359.1	uncharacterized LOC100382127	Zea mays
XP008651652.1	uncharacterized isoform X1	Zea mays
XP035819355.1	myb-related protein P-like	Zea mays
XP035819362.1	myb-related protein P-like	Zea mays
XP035819356.1	myb-related protein P-like	Zea mays
XP020401762.2	myb-related protein P-like	Zea mays
XP035819359.1	myb-related protein P-like	Zea mays
XP035819363.1	myb-related protein P-like	Zea mays
NP001278607.2	myb-related protein P	Zea mays
XP020401755.2	LOW QUALITY PROTEIN: myb-related protein P-like	Zea mays
XP020401761.1	myb-related protein P-like	Zea mays
NP001148463.2	myb-related protein Myb4	Zea mays
NP001105937.1	R2R3 Myb transcription factor MYB-IF25	Zea mays
XP023157710.1	R2R3 Myb transcription factor MYB-IF35 isoform X1	Zea mays
NP001105092.1	R2R3 Myb transcription factor MYB-IF35	Zea mays
XP008656780.1	transcription repressor MYB5	Zea mays
XP008659144.1	anthocyanin regulatory C1 protein	Zea mays
XP008648335.1	PL transcription factor isoform X1	Zea mays
NP001358856.1	PL transcription factor	Zea mays
NP001148988.1	myb-related protein Hv33	Zea mays
NP001150099.1	myb-related protein Hv33	Zea mays
NP001168460.1	Myb-related protein Hv33	Zea mays
NP001140604.1	MYB transcription factor	Zea mays
NP001170039.1	uncharacterized LOC100383951	Zea mays
NP001131823.1	Transcription factor MYB61	Zea mays
NP001132616.2	uncharacterized LOC100194090	Zea mays
NP001147101.1	Transcription factor MYB61	Zea mays
NP001132070.1	MYB transcription factor	Zea mays
NP001140269.1	Transcription factor MYB61	Zea mays
XP008675683.1	myb-related protein Hv33	Zea mays
XP023157654.2	uncharacterized isoform X1	Zea mays
NP001148338.1	uncharacterized LOC100281948	Zea mays
NP001357635.1	uncharacterized protein LOC100285212	Zea mays
XP008653094.1	transcription factor MYB21	Zea mays
XP008645164.1	transcription factor MYB8	Zea mays
NP001141302.1	uncharacterized LOC100273393	Zea mays
NP001140400.1	uncharacterized LOC100272454	Zea mays
NP001151654.1	anthocyanin regulatory C1 protein	Zea mays
XP008669936.1	transcription factor MYB82 isoform X1	Zea mays
XP008669937.1	transcription factor MYB86 isoform X2	Zea mays
NP001241859.1	Transcription factor MYB83	Zea mays
XP008662308.1	transcription factor MYB83 isoform X1	Zea mays
NP001307849.1	Protein ODORANT1	Zea mays
NP001307849.1	Protein ODORANT1	Zea mays
XP008650758.1	protein ODORANT1 isoform X1	Zea mays
XP035816221.1	protein ODORANT1 isoform X2	Zea mays
NP001169938.1	Protein ODORANT1	Zea mays
XP008645563.1	protein ODORANT1 isoform X1	Zea mays
XP020404815.1	protein ODORANT1-like	Zea mays
XP008679710.1	protein ODORANT1	Zea mays
NP001281099.1	uncharacterized LOC100216895	Zea mays
NP001358863.1	uncharacterized protein LOC100283401	Zea mays
NP001354392.1	Transcription factor MYB20	Zea mays
XP008652684.1	protein ODORANT1	Zea mays
XP008652685.1	transcription factor MYB20	Zea mays
XP008663545.1	myb-related protein Zm1-like	Zea mays
XP008663546.1	myb-related protein Zm1-like	Zea mays
NP001359091.1	myb-related protein Zm1	Zea mays
NP001151396.1	myb-related protein Zm1 isoform 2	Zea mays
NP001152187.1	myb-related protein Zm1	Zea mays
NP001170585.1	Transcription factor MYB30	Zea mays
XP020393877.1	transcription factor MYB30	Zea mays
XP008669188.1	transcription factor MYB4	Zea mays
NP001140890.1	MYB transcription factor	Zea mays
NP001296459.1	myb-related protein Myb4	Zea mays
NP001358610.1	transcription factor MYB39	Zea mays
NP001131421.1	uncharacterized LOC100192750	Zea mays
XP008661372.1	uncharacterized protein LOC100192750 isoform X1	Zea mays
XP008669097.2	transcription factor MYB17	Zea mays
NP001358758.1	Transcription factor MYB17	Zea mays
NP001140376.1	Transcription factor MYB17	Zea mays
XP023157377.1	transcription factor MYB16	Zea mays
NP001338724.1	Transcription factor MYB106	Zea mays
XP008678586.1	transcription factor MYB16	Zea mays
XP008664663.1	transcription factor MYB16 isoform X1	Zea mays
XP008664664.1	transcription factor MYB16 isoform X2	Zea mays
XP008653224.1	transcription factor MYB39	Zea mays
XP008670489.1	transcription factor MYB41	Zea mays
NP001170417.1	Transcription factor MYB93	Zea mays
NP001168694.1	uncharacterized LOC100382484	Zea mays
NP001307868.1	uncharacterized protein LOC103654460	Zea mays
XP008659377.1	transcription factor MYB2	Zea mays
XP008648740.1	transcription factor MYB39	Zea mays
NP001105856.1	transcription factor MYB2	Zea mays
NP001146153.1	Myb-related protein 330	Zea mays
XP020407304.1	uncharacterized protein	Zea mays
NP001106037.1	transcription factor MYB8	Zea mays
NP001170228.1	uncharacterized LOC100384181	Zea mays
XP008655313.1	uncharacterized isoform X1	Zea mays
NP001344512.1	Myb-related protein 308 isoform 1	Zea mays
NP001131856.1	Myb-related protein 330-like	Zea mays
XP008657016.1	myb-related protein 308	Zea mays
NP001170687.1	Myb-related protein 308 isoform 2	Zea mays
XP008664600.1	myb-related protein Zm38	Zea mays
Zm00001d053220	myb transcription factor 42	Zea mays
NP001105949.2	MYB31 transcription factor31	Zea mays
XP035820344.1	MYB31 transcription factor31 isoform X1	Zea mays
XP008653574.1	myb-related protein Hv1 isoform X1	Zea mays
XP035817106.1	myb-related protein Hv1 isoform X2	Zea mays
