# Supplementary material for: Genome-wide association study identifies ZmMYB42 as a candidate gene for resistance to maize head smut
Source: Research Square preprint supplement (doi:10.21203/rs.3.rs-5898765/v1), 2025-04-23
Supplement: Supplementary file 4 [file 585b4c5ff51956008ec257ca.xlsx]

## Sheet: Sheet1
Table S2 Correlation analysis of head smut incidence in 2022 and 2023
	Correlation	Head smut incidence in 2022	Head smut incidence in 2023
Pearson Correlation	Head smut incidence in 2022	1	0.682**
Significance (two-tailed)			3.2002e-114
Pearson Correlation	Head smut incidence in 2023	0.682**	1
Significance (two-tailed)		3.2002e-114
