# Supplementary material for: Genome-wide association study identifies ZmMYB42 as a candidate gene for resistance to maize head smut
Source: Research Square preprint supplement (doi:10.21203/rs.3.rs-5898765/v1), 2025-04-23
Supplement: Supplementary file 6 [file 7e17cbf09682936234bcda3d.xlsx]

## Sheet: Sheet1
Table S8 Results of correlation analysis between gene sequence variation of ZmMYB42 and resistance to head smut in maize inbred lines
Marker	location	Allele	p-value	F value	Contribution rate
SNP837	837	G/C	0.00259	13.9871	0.1811
SNP273	273	C/G	0.0103	4.4604	0.1464
SNP276	276	G/C	0.03631	4.4604	0.1464
SNP277	277	C/G	0.03631	4.4604	0.1464
SNP402	402	A/T	0.03804	4.3787	0.1464
SNP702	702	C/G	0.03804	4.3787	0.1049
SNP703	703	C/G	0.03804	4.3787	0.1049
SNP704	704	A/C	0.03804	4.3787	0.1049
SNP716	716	G/C	0.03804	4.3787	0.1049
SNP883	883	C/G	0.03804	4.3787	0.1049
SNP884	884	A/T	0.03804	4.3787	0.1049
Note: The location indicates the ATG start base position
