# Supplementary material for: Genome-wide association study identifies ZmMYB42 as a candidate gene for resistance to maize head smut
Source: Research Square preprint supplement (doi:10.21203/rs.3.rs-5898765/v1), 2025-04-23
Supplement: Supplementary file 7 [file adf1f205b43d16827ce71461.xlsx]

## Sheet: Sheet1
Table S1 Head smut incidence of 292 maize inbred lines in 2022 and 2023
Number	Name	Repeat	Head smut incidence in 2022	Average head smut incidence in 2022	BLUE value of head smut incidence in 2022	Head smut incidence in 2023	Average head smut incidence in 2023	BLUE value of head smut incidence in 2023
1	ZhongM_8	Repeat 1	0	0.00966667	0.00961539	0.025	0.021	0.0250104
	ZhongM_8	Repeat 2	0.018			0.026
	ZhongM_8	Repeat 3	0.011			0.012
2	L237	Repeat 1	0	0	0.0116279	0	0	0.0135135
	L237	Repeat 2	0			0
	L237	Repeat 3	0			0
3	Ying64	Repeat 1	0.32	0.358	0.355926	1	0.932	0.939518
	Ying64	Repeat 2	0.396			0.875
	Ying64	Repeat 3	0.358			0.921
4	DG11A	Repeat 1	0	0.00933333	0.00943396	0.018	0.0266667	0.0196995
	DG11A	Repeat 2	0.016			0.02
	DG11A	Repeat 3	0.012			0.042
5	Dong237	Repeat 1	0.15	0.129333	0.125789	0.269	0.260333	0.25688
	Dong237	Repeat 2	0.079			0.206
	Dong237	Repeat 3	0.159			0.306
6	1134	Repeat 1	0.044	0.0233333	0.022739	0.37	0.0185	0.0385185
	1134	Repeat 2	0			NA
	1134	Repeat 3	0.026			0
7	K10	Repeat 1	0.041	0.0313333	0.03125	0.07	0.073	0.0779665
	K10	Repeat 2	0.021			0.088
	K10	Repeat 3	0.032			0.061
8	LK11	Repeat 1	0	0	0.00877193	0.057	0.0586667	0.0585231
	LK11	Repeat 2	0			0.069
	LK11	Repeat 3	0			0.05
9	KL3	Repeat 1	0.046	0.024	0.0238095	0.045	0.0526667	0.0525959
	KL3	Repeat 2	0			0.053
	KL3	Repeat 3	0.026			0.06
10	Long53	Repeat 1	0.111	0.124	0.124183	0.378	0.337667	0.34847
	Long53	Repeat 2	0.141			0.356
	Long53	Repeat 3	0.12			0.279
11	Fu706	Repeat 1	0	0	0	0.259	0.254333	0.233598
	Fu706	Repeat 2	0			0.229
	Fu706	Repeat 3	0			0.275
12	He344	Repeat 1	0	0	0	0.02	0.0276667	0
	He344	Repeat 2	0			0.044
	He344	Repeat 3	0			0.019
13	Dong6002	Repeat 1	0.429	0.5	0.52381	0.64	0.678	0.647677
	Dong6002	Repeat 2	0.521			0.667
	Dong6002	Repeat 3	0.55			0.727
14	Ji846	Repeat 1	0	0.0216667	0.0227743	0.103	0.115	0.115322
	Ji846	Repeat 2	0.044			0.137
	Ji846	Repeat 3	0.021			0.105
15	KL2	Repeat 1	0.091	0.074	0.074026	0.063	0.0745	0.0657328
	KL2	Repeat 2	0.061			NA
	KL2	Repeat 3	0.07			0.086
16	KL6	Repeat 1	0	0	0	NA	0.1545	0.145098
	KL6	Repeat 2	0			0.176
	KL6	Repeat 3	0			0.133
17	D3_1	Repeat 1	0.233	0.253	0.254545	NA	0.3285	0.367647
	D3_1	Repeat 2	0.283			0.275
	D3_1	Repeat 3	0.243			0.382
18	HR30	Repeat 1	0.048	0.0483333	0.0481998	0.109	0.114333	0.114031
	HR30	Repeat 2	0.052			0.115
	HR30	Repeat 3	0.045			0.119
19	KWS10_73	Repeat 1	0	0.01	0.01	0.14	0.141	0.140789
	KWS10_73	Repeat 2	0.02			0.143
	KWS10_73	Repeat 3	0.01			0.14
20	KWS49	Repeat 1	0.125	0.175667	0.174086	NA	0.1795	0.194203
	KWS49	Repeat 2	0.231			0.2
	KWS49	Repeat 3	0.171			0.159
21	Jia33	Repeat 1	0.136	0.121667	0.121753	0.164	0.188333	0.173687
	Jia33	Repeat 2	0.108			0.222
	Jia33	Repeat 3	0.121			0.179
22	Jia28	Repeat 1	0.121	0.125667	0.125823	0.031	0.0525	0.0590278
	Jia28	Repeat 2	0.135			NA
	Jia28	Repeat 3	0.121			0.074
23	KW5G321	Repeat 1	0	0	0	0.028	0.0323333	0.0273924
	KW5G321	Repeat 2	0			0.045
	KW5G321	Repeat 3	0			0.024
24	KW1A139	Repeat 1	0.018	0.017	0.00819672	0	0	0.00684931
	KW1A139	Repeat 2	0.018			0
	KW1A139	Repeat 3	0.015			0
25	H1208	Repeat 1	0.018	0.017	0.00909091	0	0.00566667	0.00555556
	H1208	Repeat 2	0.018			0
	H1208	Repeat 3	0.015			0.017
26	He344_1	Repeat 1	0.22	0.175667	0.172593	0.52	0.447333	0.407347
	He344_1	Repeat 2	0.111			0.407
	He344_1	Repeat 3	0.196			0.415
27	L203	Repeat 1	0.044	0.04	0.039916	0.111	0.125333	0.125215
	L203	Repeat 2	0.04			0.125
	L203	Repeat 3	0.036			0.14
28	81162	Repeat 1	0.019	0.009	0.00909091	NA	0.1195	0.119609
	81162	Repeat 2	0			0.132
	81162	Repeat 3	0.008			0.107
29	8638	Repeat 1	0.311	0.263	0.263158	0.2	0.242667	0.244638
	8638	Repeat 2	0.263			0.293
	8638	Repeat 3	0.215			0.235
30	833	Repeat 1	0.082	0.0753333	0.0754664	0.093	0.104667	0.104704
	833	Repeat 2	0.069			0.119
	833	Repeat 3	0.075			0.102
31	9F592	Repeat 1	0.183	0.139667	0.151923	0.628	0.749333	0.745183
	9F592	Repeat 2	0.1			0.842
	9F592	Repeat 3	0.136			0.778
32	6F576	Repeat 1	0.213	0.251	0.250827	0.39	0.474333	0.468292
	6F576	Repeat 2	0.285			0.623
	6F576	Repeat 3	0.255			0.41
33	KL613	Repeat 1	0.02	0.054	0.0541176	0	0.123333	0.185106
	KL613	Repeat 2	0.092			0.17
	KL613	Repeat 3	0.05			0.2
34	385_1	Repeat 1	0	0	0.0125	0.116	0.109	0.109091
	385_1	Repeat 2	0			0.108
	385_1	Repeat 3	0			0.103
35	HA25	Repeat 1	0	0	0.0111111	0.04	0.04	0.0400641
	HA25	Repeat 2	0			0.039
	HA25	Repeat 3	0			0.041
36	KL45	Repeat 1	0.068	0.0226667	0.0681818	0.194	0.210667	0.210847
	KL45	Repeat 2	0			0.238
	KL45	Repeat 3	0			0.2
37	Ji63	Repeat 1	0.02	0.00966667	0.0192308	0.051	0.071	0.0709836
	Ji63	Repeat 2	0			0.085
	Ji63	Repeat 3	0.009			0.077
38	Xi14	Repeat 1	0.05	0.0503333	0.050641	0.07	0.0703333	0.0704572
	Xi14	Repeat 2	0.051			0.07
	Xi14	Repeat 3	0.05			0.071
39	Mo17	Repeat 1	0.017	0.00866667	0.00862069	0	0.008	0.0153765
	Mo17	Repeat 2	0			0
	Mo17	Repeat 3	0.009			0.024
40	ZaC546	Repeat 1	0.044	0.027	0.027027	0.083	0.074	0.0699187
	ZaC546	Repeat 2	0			0.075
	ZaC546	Repeat 3	0.037			0.064
41	70_104	Repeat 1	0.08	0.0383333	0.0384615	0.275	0.236333	0.235869
	70_104	Repeat 2	0			0.22
	70_104	Repeat 3	0.035			0.214
42	L105	Repeat 1	0.275	0.304667	0.304598	0.39	0.320333	0.324635
	L105	Repeat 2	0.333			0.333
	L105	Repeat 3	0.306			0.238
43	446	Repeat 1	0.05	0.049	0.0488095	0.157	0.142	0.138733
	446	Repeat 2	0.051			0.135
	446	Repeat 3	0.046			0.134
44	Ji853	Repeat 1	0.027	0.024	0.0243369	0	0.0326667	0.178496
	Ji853	Repeat 2	0.023			0.051
	Ji853	Repeat 3	0.022			0.047
45	434	Repeat 1	0.151	0.173667	0.173511	0.469	0.4635	0.391794
	434	Repeat 2	0.194			NA
	434	Repeat 3	0.176			0.458
46	4F1	Repeat 1	0	0	0.00793651	0.071	0.079	0.0106472
	4F1	Repeat 2	0			0.099
	4F1	Repeat 3	0			0.067
47	444	Repeat 1	0.146	0.095	0.138388	0.481	0.504667	0.433951
	444	Repeat 2	0.044			0.533
	444	Repeat 3	0.095			0.5
48	Ji002	Repeat 1	0.04	0.021	0.0208333	0.057	0.0523333	0.052381
	Ji002	Repeat 2	0			0.056
	Ji002	Repeat 3	0.023			0.044
49	S8_101	Repeat 1	0.071	0.0696667	0.0698052	0.111	0.122	0.122182
	S8_101	Repeat 2	0.072			0.125
	S8_101	Repeat 3	0.066			0.13
50	7922	Repeat 1	0.241	0.238	0.238337	0.179	0.1495	0.143718
	7922	Repeat 2	0.238			NA
	7922	Repeat 3	0.235			0.12
51	7884_7Ht	Repeat 1	0.029	0.0216667	0.0216603	0.028	0.0266667	0.026509
	7884_7Ht	Repeat 2	0.015			0.025
	7884_7Ht	Repeat 3	0.021			0.027
52	96478	Repeat 1	0.199	0.138	0.128627	0.089	0.091	0.090984
	96478	Repeat 2	0.08			0.097
	96478	Repeat 3	0.135			0.087
53	Ji992	Repeat 1	0.026	0.03	0.0300619	0.038	0.0406667	0.0314694
	Ji992	Repeat 2	0.033			0.028
	Ji992	Repeat 3	0.031			0.056
54	Ji1037	Repeat 1	0.058	0.04	0	0	0.00933333	0
	Ji1037	Repeat 2	0.02			0.015
	Ji1037	Repeat 3	0.042			0.013
55	Si_287	Repeat 1	0	0	0.0351515	0.034	0.035	0.0459831
	Si_287	Repeat 2	0			0.034
	Si_287	Repeat 3	0			0.037
56	W9706	Repeat 1	0.02	0.009	0.00877193	0.029	0.00966667	0.00476191
	W9706	Repeat 2	0			0
	W9706	Repeat 3	0.007			0
57	8902	Repeat 1	0	0.017	0.478879	0.456	0.476667	0.476747
	8902	Repeat 2	0.036			0.5
	8902	Repeat 3	0.015			0.474
58	Cheng351	Repeat 1	0.018	0.01	0.137218	0.086	0.1215	0.149742
	Cheng351	Repeat 2	0			0.157
	Cheng351	Repeat 3	0.012			NA
59	D22	Repeat 1	0.025	0.034	0.0342391	0	0.171	0.266341
	D22	Repeat 2	0.045			0.293
	D22	Repeat 3	0.032			0.22
60	KX	Repeat 1	0	0	0.0106383	0	0	0.00628931
	KX	Repeat 2	0			0
	KX	Repeat 3	0			0
61	Ji046	Repeat 1	0.056	0.054	0.062	NA	0.1655	0.062
	Ji046	Repeat 2	0.055			0.191
	Ji046	Repeat 3	0.051			0.14
62	Dan598	Repeat 1	0.131	0.115667	0.128074	0.266	0.268	0.267772
	Dan598	Repeat 2	0.102			0.271
	Dan598	Repeat 3	0.114			0.267
63	XF	Repeat 1	0.085	0.0683333	0.0864382	0.044	0.0565	0.0714869
	XF	Repeat 2	0.055			NA
	XF	Repeat 3	0.065			0.069
64	634150	Repeat 1	0	0.015	0.0580808	0.043	0.055	0.0556809
	634150	Repeat 2	0.02			0.094
	634150	Repeat 3	0.025			0.028
65	TM	Repeat 1	0.12	0.139667	0.139545	0.3	0.3375	0.354167
	TM	Repeat 2	0.149			0.375
	TM	Repeat 3	0.15			NA
66	M407	Repeat 1	0.054	0.0586667	0.0674603	0.098	0.096	0.104853
	M407	Repeat 2	0.065			0.091
	M407	Repeat 3	0.057			0.099
67	F62	Repeat 1	0.115	0.105667	0.115385	0.159	0.154667	0.153475
	F62	Repeat 2	0.096			0.114
	F62	Repeat 3	0.106			0.191
68	Dan340	Repeat 1	0	0.0333333	0.0611111	0.127	0.157	0.101443
	Dan340	Repeat 2	0.057			0.164
	Dan340	Repeat 3	0.043			0.18
69	Cheng18	Repeat 1	0.064	0.0633333	0.0633907	0.072	0.0673333	0.0723945
	Cheng18	Repeat 2	0.073			0.068
	Cheng18	Repeat 3	0.053			0.062
70	Si144	Repeat 1	0.039	0.029	0.0577137	NA	0.1155	0.115779
	Si144	Repeat 2	0.023			0.101
	Si144	Repeat 3	0.025			0.13
71	HYM	Repeat 1	0.017	0.01	0.01	0.04	0.055	0.0443579
	HYM	Repeat 2	0			0.03
	HYM	Repeat 3	0.013			0.095
72	Mo17Ht	Repeat 1	0	0	0.00909091	0.04	0.0463333	0.0463041
	Mo17Ht	Repeat 2	0			0.055
	Mo17Ht	Repeat 3	0			0.044
73	Shen5003	Repeat 1	0.425	0.426	0.425824	0.438	0.454667	0.45386
	Shen5003	Repeat 2	0.429			0.426
	Shen5003	Repeat 3	0.424			0.5
74	KYC8605	Repeat 1	0	0	0.0125	0.085	0.087	0.0870157
	KYC8605	Repeat 2	0			0.088
	KYC8605	Repeat 3	0			0.088
75	7_61	Repeat 1	0.195	0.218	0.218105	0.395	0.346333	0.346593
	7_61	Repeat 2	0.244			0.302
	7_61	Repeat 3	0.215			0.342
76	Liao2345	Repeat 1	0.083	0.075	0.166667	0.058	0.0573333	0.220819
	Liao2345	Repeat 2	0.077			0.069
	Liao2345	Repeat 3	0.065			0.045
77	8112	Repeat 1	0.098	0.0876667	0.103026	0.306	0.358333	0.354962
	8112	Repeat 2	0.079			0.436
	8112	Repeat 3	0.086			0.333
78	Liao1412	Repeat 1	0.064	0.0633333	0.0631649	0.179	0.178667	0.178755
	Liao1412	Repeat 2	0.061			0.193
	Liao1412	Repeat 3	0.065			0.164
79	LD175_1	Repeat 1	0.063	0.033	0.0672696	0.155	0.158667	0.159695
	LD175_1	Repeat 2	0			0.133
	LD175_1	Repeat 3	0.036			0.188
80	D26	Repeat 1	0.236	0.133333	0.217974	0.111	0.0996667	0.272439
	D26	Repeat 2	0.034			0.093
	D26	Repeat 3	0.13			0.095
81	Dan3130	Repeat 1	0.096	0.047	0.116604	0.321	0.329	0.335022
	Dan3130	Repeat 2	0			0.386
	Dan3130	Repeat 3	0.045			0.28
82	A801	Repeat 1	0	0	0.0104167	0.054	0.0436667	0.0540541
	A801	Repeat 2	0			0.047
	A801	Repeat 3	0			0.03
83	Liao68	Repeat 1	0	0	0.051176	NA	0.1075	0.107718
	Liao68	Repeat 2	0			0.106
	Liao68	Repeat 3	0			0.109
84	LIao3180	Repeat 1	0	0.0266667	0.0267857	0.04	0.051	0.0507459
	LIao3180	Repeat 2	0.054			0.058
	LIao3180	Repeat 3	0.026			0.055
85	K12	Repeat 1	0	0	0	NA	0.0575	0.537548
	K12	Repeat 2	0			0.066
	K12	Repeat 3	0			0.049
86	Shen151	Repeat 1	0.094	0.083	0.0828841	0.054	0.0553333	0.103209
	Shen151	Repeat 2	0.072			0.042
	Shen151	Repeat 3	0.083			0.07
87	Dan717	Repeat 1	0.125	0.121333	0.121324	0.122	0.125667	0.125618
	Dan717	Repeat 2	0.119			0.118
	Dan717	Repeat 3	0.12			0.137
88	Zheng22	Repeat 1	0.21	0.191667	0.200993	0.333	0.3245	0.324561
	Zheng22	Repeat 2	0.173			0.316
	Zheng22	Repeat 3	0.192			NA
89	Liao3162	Repeat 1	0.017	0.0176667	0.0175926	0.054	0.0486667	0.0484127
	Liao3162	Repeat 2	0.019			0.042
	Liao3162	Repeat 3	0.017			0.05
90	PH09B	Repeat 1	0	0	0.00806452	0.019	0.035	0.0670152
	PH09B	Repeat 2	0			0.02
	PH09B	Repeat 3	0			0.066
91	PHPMO	Repeat 1	0.109	0.095	0.0948884	0.143	0.134333	0.134197
	PHPMO	Repeat 2	0.091			0.128
	PHPMO	Repeat 3	0.085			0.132
92	Dan988	Repeat 1	0	0	0.0394704	0.049	0.035	0.0572016
	Dan988	Repeat 2	0			0
	Dan988	Repeat 3	0			0.056
93	DanT138	Repeat 1	0.031	0.0246667	0.0338068	0.03	0.0303333	0.0370398
	DanT138	Repeat 2	0.022			0.041
	DanT138	Repeat 3	0.021			0.02
94	Liao6082	Repeat 1	0.138	0.093	0.128489	0.075	0.0975	0.172451
	Liao6082	Repeat 2	0.058			NA
	Liao6082	Repeat 3	0.083			0.12
95	7017	Repeat 1	0	0	0.0774017	0.132	0.131	0.142005
	7017	Repeat 2	0			0.163
	7017	Repeat 3	0			0.098
96	Dan99C	Repeat 1	0.038	0.037	0.0689858	0.057	0.053	0.111685
	Dan99C	Repeat 2	0.038			0.043
	Dan99C	Repeat 3	0.035			0.059
97	Shen3336	Repeat 1	0.029	0.139333	0.246429	0.081	0.107	0.226961
	Shen3336	Repeat 2	0.255			0.119
	Shen3336	Repeat 3	0.134			0.121
98	Shen3265	Repeat 1	0.047	0.115667	0.0995066	0.098	0.118667	0.250593
	Shen3265	Repeat 2	0.189			0.115
	Shen3265	Repeat 3	0.111			0.143
99	Dan360	Repeat 1	0	0	0.0833333	0.094	0.0825	0.0918127
	Dan360	Repeat 2	0			0.071
	Dan360	Repeat 3	0			NA
100	CL143	Repeat 1	0.014	0.0163333	0.0164021	0.023	0.023	0.029485
	CL143	Repeat 2	0.019			0.021
	CL143	Repeat 3	0.016			0.025
101	PH6JM	Repeat 1	0	0	0.00757576	0	0.00366667	0.00749064
	PH6JM	Repeat 2	0			0
	PH6JM	Repeat 3	0			0.011
102	Dan6263	Repeat 1	0	0.053	0.108747	NA	0.3145	0.314145
	Dan6263	Repeat 2	0.104			0.313
	Dan6263	Repeat 3	0.055			0.316
103	C260	Repeat 1	0.149	0.142333	0.142423	0.431	0.388333	0.397635
	C260	Repeat 2	0.138			0.364
	C260	Repeat 3	0.14			0.37
104	C168	Repeat 1	0	0	0.151391	0.273	0.293	0.300337
	C168	Repeat 2	0			0.3
	C168	Repeat 3	0			0.306
105	Liao7980	Repeat 1	0.044	0.0566667	0.0716484	0.254	0.2915	0.319313
	Liao7980	Repeat 2	0.069			0.329
	Liao7980	Repeat 3	0.057			NA
106	F12	Repeat 1	0	0	0.0889328	0.207	0.188333	0.211823
	F12	Repeat 2	0			0.179
	F12	Repeat 3	0			0.179
107	K0325	Repeat 1	0	0	0	0.102	0.097	0.102864
	K0325	Repeat 2	0			0.086
	K0325	Repeat 3	0			0.103
108	2511A	Repeat 1	0.543	0.326333	0.520833	0.927	0.9635	0.987805
	2511A	Repeat 2	0.111			1
	2511A	Repeat 3	0.325			NA
109	Z3_87	Repeat 1	0	0	0.214559	0.208	0.2315	0.240659
	Z3_87	Repeat 2	0			NA
	Z3_87	Repeat 3	0			0.255
110	M60	Repeat 1	0.045	0.035	0.0477273	0.062	0.0583333	0.0637383
	M60	Repeat 2	0.03			0.064
	M60	Repeat 3	0.03			0.049
111	K3841	Repeat 1	0	0	0	0.234	0.231	0.230952
	K3841	Repeat 2	0			0.228
	K3841	Repeat 3	0			0.231
112	SD7928	Repeat 1	0.017	0.0166667	0.0165391	0.012	0.004	0.0571818
	SD7928	Repeat 2	0.018			0
	SD7928	Repeat 3	0.015			0
113	SD8738	Repeat 1	0.048	0.0533333	0.0532213	0.234	0.219	0.219368
	SD8738	Repeat 2	0.06			0.22
	SD8738	Repeat 3	0.052			0.203
114	Shen3117	Repeat 1	0	0.0136667	0.0478604	0.153	0.151333	0.151098
	Shen3117	Repeat 2	0.017			0.158
	Shen3117	Repeat 3	0.024			0.143
115	Dan37	Repeat 1	0	0	0.0178571	0.053	0.043	0.0483819
	Dan37	Repeat 2	0			0.042
	Dan37	Repeat 3	0			0.034
116	M03	Repeat 1	0.053	0.035	0.0426774	0.09	0.084	0.094212
	M03	Repeat 2	0.021			0.08
	M03	Repeat 3	0.031			0.082
117	M5972	Repeat 1	0.4	0.4	0.4	NA	0.2315	0.463602
	M5972	Repeat 2	0.35			0.222
	M5972	Repeat 3	0.45			0.241
118	Ming84	Repeat 1	0	0	0.0147858	0.06	0.0546667	0.0603206
	Ming84	Repeat 2	0			0.054
	Ming84	Repeat 3	0			0.05
119	Ming71	Repeat 1	0	0	0	0.428	0.426	0.426044
	Ming71	Repeat 2	0			0.427
	Ming71	Repeat 3	0			0.423
120	TieT0403	Repeat 1	0.088	0.0916667	0.21646	0.66	0.440333	0.541308
	TieT0403	Repeat 2	0.105			0.457
	TieT0403	Repeat 3	0.082			0.204
121	M53	Repeat 1	0.119	0.113	0.113095	0.075	0.073	0.145479
	M53	Repeat 2	0.117			0.069
	M53	Repeat 3	0.103			0.075
122	S127	Repeat 1	0.103	0.128333	0.141026	NA	0.0375	0.226496
	S127	Repeat 2	0.157			0.038
	S127	Repeat 3	0.125			0.037
123	Shen391	Repeat 1	0.038	0.036	0.0542699	0.113	0.1015	0.108577
	Shen391	Repeat 2	0.04			0.09
	Shen391	Repeat 3	0.03			NA
124	Shen8078	Repeat 1	0.177	0.0833333	0.0729167	0.086	0.084	0.0841165
	Shen8078	Repeat 2	0			0.081
	Shen8078	Repeat 3	0.073			0.085
125	Tie84	Repeat 1	0.15	0.159667	0.171904	0.311	0.347333	0.355021
	Tie84	Repeat 2	0.173			0.391
	Tie84	Repeat 3	0.156			0.34
126	Lv9W	Repeat 1	0.088	0.097	0.0833333	0.182	0.163333	0.16317
	Lv9W	Repeat 2	0.111			0.154
	Lv9W	Repeat 3	0.092			0.154
127	9137	Repeat 1	0.022	0.0223333	0.0224975	0.137	0.136667	0.13651
	9137	Repeat 2	0.025			0.12
	9137	Repeat 3	0.02			0.153
128	391	Repeat 1	0.189	0.163333	0.189167	0.762	0.762	0.761905
	391	Repeat 2	0.136			0.759
	391	Repeat 3	0.165			0.765
129	XKZA34	Repeat 1	0.071	0.067	0.0669643	0.219	0.197667	0.202462
	XKZA34	Repeat 2	0.061			0.196
	XKZA34	Repeat 3	0.069			0.178
130	XKZ167_1	Repeat 1	0	0	0.0188034	0.052	0.053	0.0527103
	XKZ167_1	Repeat 2	0			0.042
	XKZ167_1	Repeat 3	0			0.065
131	GLMo17	Repeat 1	0	0	0	0.016	0.00533333	0.00546448
	GLMo17	Repeat 2	0			0
	GLMo17	Repeat 3	0			0
132	JZL610	Repeat 1	0	0	0.0116279	0.027	0.0213333	0.0214228
	JZL610	Repeat 2	0			0.02
	JZL610	Repeat 3	0			0.017
133	Chang7_2	Repeat 1	0.5	0.535667	0.690476	0.947	0.96	0.988889
	Chang7_2	Repeat 2	0.551			0.933
	Chang7_2	Repeat 3	0.556			1
134	KH786	Repeat 1	0.014	0.00733333	0.00746269	0.026	0.025	0.0250985
	KH786	Repeat 2	0			0.02
	KH786	Repeat 3	0.008			0.029
135	KH467	Repeat 1	0.022	0.026	0.0262626	0.119	0.117	0.116795
	KH467	Repeat 2	0.02			0.116
	KH467	Repeat 3	0.036			0.116
136	773_2G	Repeat 1	0	0	0	0.286	0.294	0.359587
	773_2G	Repeat 2	0			0.349
	773_2G	Repeat 3	0			0.247
137	917	Repeat 1	0.031	0.031	0.03125	0.033	0.0316667	0.0315629
	917	Repeat 2	0.032			0.026
	917	Repeat 3	0.03			0.036
138	Hei2	Repeat 1	0.049	0.0346667	0.0445902	0.25	0.243	0.276357
	Hei2	Repeat 2	0.024			0.279
	Hei2	Repeat 3	0.031			0.2
139	K454	Repeat 1	0.019	0.01	0.0196078	0.014	0.011	0.0230159
	K454	Repeat 2	0			0.009
	K454	Repeat 3	0.011			0.01
140	M502	Repeat 1	0.047	0.061	0.0726196	0.5	0.485	0.484848
	M502	Repeat 2	0.075			0.455
	M502	Repeat 3	0.061			0.5
141	7857	Repeat 1	0.034	0.0423333	0.0508475	0.073	0.077	0.077168
	7857	Repeat 2	0.048			0.083
	7857	Repeat 3	0.045			0.075
142	Xin444	Repeat 1	0	0	0.0111111	0	0	0.005291
	Xin444	Repeat 2	0			0
	Xin444	Repeat 3	0			0
143	Zong31	Repeat 1	0	0	0	0	0	0
	Zong31	Repeat 2	0			0
	Zong31	Repeat 3	0			0
144	P138	Repeat 1	0.037	0.019	0	0	0	0
	P138	Repeat 2	0			0
	P138	Repeat 3	0.02			0
145	Zhong451	Repeat 1	0.056	0.0603333	0.220388	0.309	0.302	0.301915
	Zhong451	Repeat 2	0.065			0.291
	Zhong451	Repeat 3	0.06			0.306
146	ZZ01	Repeat 1	0	0.01	0.343934	0.026	0.013	0.279365
	ZZ01	Repeat 2	0.013			0.013
	ZZ01	Repeat 3	0.017			0
147	HZS	Repeat 1	0.512	0.527667	0.527526	0.743	0.729	0.729101
	HZS	Repeat 2	0.548			0.75
	HZS	Repeat 3	0.523			0.694
148	5213	Repeat 1	0.019	0.012	0.0288618	0.077	0.0713333	0.0779286
	5213	Repeat 2	0			0.059
	5213	Repeat 3	0.017			0.078
149	CN165	Repeat 1	0.224	0.21	0.0611179	0.364	0.385	0.391041
	CN165	Repeat 2	0.196			0.391
	CN165	Repeat 3	0.21			0.4
150	CN4379	Repeat 1	0.034	0.0256667	0.034493	0.2	0.1835	0.204167
	CN4379	Repeat 2	0.018			NA
	CN4379	Repeat 3	0.025			0.167
151	YFH	Repeat 1	0.034	0.0366667	0.0921231	0.514	0.477333	0.476991
	YFH	Repeat 2	0.041			0.489
	YFH	Repeat 3	0.035			0.429
152	F349	Repeat 1	0	0.075	0.15	NA	0.1715	0.171569
	F349	Repeat 2	0.155			0.176
	F349	Repeat 3	0.07			0.167
153	P25	Repeat 1	0.345	0.362667	0.362607	0.813	0.8295	0.829327
	P25	Repeat 2	0.381			0.846
	P25	Repeat 3	0.362			NA
154	Qi205	Repeat 1	0	0	0.0294118	0.141	0.160333	0.160123
	Qi205	Repeat 2	0			0.167
	Qi205	Repeat 3	0			0.173
155	CA375	Repeat 1	0.154	0.148333	0.245421	0.103	0.085	0.421272
	CA375	Repeat 2	0.146			0.082
	CA375	Repeat 3	0.145			0.07
156	Jing501	Repeat 1	0.13	0.127667	0.127717	0.109	0.141	0.146242
	Jing501	Repeat 2	0.127			0.147
	Jing501	Repeat 3	0.126			0.167
157	Jing24	Repeat 1	0.033	0.033	0.0333333	0.362	0.339333	0.339205
	Jing24	Repeat 2	0.023			0.323
	Jing24	Repeat 3	0.043			0.333
158	Jing89	Repeat 1	0.057	0.06	0.0596491	0.304	0.306	0.305925
	Jing89	Repeat 2	0.067			0.309
	Jing89	Repeat 3	0.056			0.305
159	Jing572	Repeat 1	0.497	0.506333	0.507588	0.828	0.741	0.740382
	Jing572	Repeat 2	0.522			0.706
	Jing572	Repeat 3	0.5			0.689
160	NH60	Repeat 1	0.026	0.0143333	0.0142857	0.063	0.063	0.0632209
	NH60	Repeat 2	0			0.065
	NH60	Repeat 3	0.017			0.061
161	Jing92	Repeat 1	0.423	0.42	0.419872	0.6	0.555	0.554776
	Jing92	Repeat 2	0.421			0.556
	Jing92	Repeat 3	0.416			0.509
162	Jing725	Repeat 1	0.213	0.217333	0.217332	0.427	0.405667	0.405504
	Jing725	Repeat 2	0.224			0.397
	Jing725	Repeat 3	0.215			0.393
163	Aijing525	Repeat 1	0.266	0.248	0.256579	0.755	0.742	0.67246
	Aijing525	Repeat 2	0.233			0.842
	Aijing525	Repeat 3	0.245			0.629
164	XL21	Repeat 1	0.556	0.490333	0.540278	0.317	0.34	0.339991
	XL21	Repeat 2	0.427			0.333
	XL21	Repeat 3	0.488			0.37
165	7010	Repeat 1	0.017	0.00966667	0.00961539	0.179	0.164333	0.164441
	7010	Repeat 2	0			0.129
	7010	Repeat 3	0.012			0.185
166	Chang3	Repeat 1	0.053	0.054	0.325699	0.077	0.0873333	0.479401
	Chang3	Repeat 2	0.059			0.099
	Chang3	Repeat 3	0.05			0.086
167	oh43Ht	Repeat 1	0.185	0.176667	0.189666	0.308	0.339667	0.339666
	oh43Ht	Repeat 2	0.158			0.391
	oh43Ht	Repeat 3	0.187			0.32
168	Hai014	Repeat 1	0.113	0.117667	0.117579	0.49	0.493	0.493028
	Hai014	Repeat 2	0.119			0.567
	Hai014	Repeat 3	0.121			0.422
169	Dong91	Repeat 1	0	0.017	0.04641	0.217	0.214	0.213921
	Dong91	Repeat 2	0.031			0.219
	Dong91	Repeat 3	0.02			0.206
170	169	Repeat 1	0.116	0.127	0.126937	0.169	0.153333	0.153361
	169	Repeat 2	0.134			0.122
	169	Repeat 3	0.131			0.169
171	81_5	Repeat 1	0	0.00766667	0.00757576	0	0	0.00819672
	81_5	Repeat 2	0.012			0
	81_5	Repeat 3	0.011			0
172	5003_1	Repeat 1	0.357	0.327667	0.327508	0.141	0.146	0.145644
	5003_1	Repeat 2	0.3			0.161
	5003_1	Repeat 3	0.326			0.136
173	Dong8112	Repeat 1	0.054	0.0656667	0.0654886	0.19	0.219333	0.2195
	Dong8112	Repeat 2	0.077			0.235
	Dong8112	Repeat 3	0.066			0.233
174	Long69	Repeat 1	0	0	0.0952381	0.151	0.18	0.176538
	Long69	Repeat 2	0			0.206
	Long69	Repeat 3	0			0.183
175	52106	Repeat 1	0.047	0.047	0.0469176	0.017	0.0133333	0.0131313
	52106	Repeat 2	0.043			0
	52106	Repeat 3	0.051			0.023
176	94_24	Repeat 1	0.132	0.091	0.140789	0.229	0.225	0.225296
	94_24	Repeat 2	0.05			0.224
	94_24	Repeat 3	0.091			0.222
177	Sui601	Repeat 1	0	0	0	0.035	0.03	0.0298569
	Sui601	Repeat 2	0			0.027
	Sui601	Repeat 3	0			0.028
178	Sui701	Repeat 1	0	0	0.00847458	0.013	0.0133333	0.0131625
	Sui701	Repeat 2	0			0.013
	Sui701	Repeat 3	0			0.014
179	Dong5416	Repeat 1	0.058	0.049	0.0492543	0.157	0.146	0.175477
	Dong5416	Repeat 2	0.04			0.123
	Dong5416	Repeat 3	0.049			0.158
180	HR10	Repeat 1	0	0	0.01	0.024	0.0366667	0.0237984
	HR10	Repeat 2	0			0.059
	HR10	Repeat 3	0			0.027
181	HR0110	Repeat 1	0.019	0.00966667	0.00980392	0.09	0.098	0.0978869
	HR0110	Repeat 2	0			0.097
	HR0110	Repeat 3	0.01			0.107
182	HR118	Repeat 1	0.029	0.041	0.0274436	NA	0.0145	0.0147059
	HR118	Repeat 2	0.051			0.029
	HR118	Repeat 3	0.043			0
183	T9	Repeat 1	0	0	0.00943396	0	0.00866667	0.00854701
	T9	Repeat 2	0			0
	T9	Repeat 3	0			0.026
184	A22	Repeat 1	0.08	0.075	0.077381	0.055	0.05	0.0496944
	A22	Repeat 2	0.071			0.059
	A22	Repeat 3	0.074			0.036
185	T116	Repeat 1	0.048	0.0503333	0.0501253	0.152	0.135333	0.135395
	T116	Repeat 2	0.053			0.118
	T116	Repeat 3	0.05			0.136
186	Jiang134	Repeat 1	0	0.0143333	0.00714286	0.099	0.113333	0.113111
	Jiang134	Repeat 2	0.029			0.111
	Jiang134	Repeat 3	0.014			0.13
187	Jin9923	Repeat 1	0.033	0.094	0.0895722	0.265	0.238667	0.238341
	Jin9923	Repeat 2	0.159			0.23
	Jin9923	Repeat 3	0.09			0.221
188	Jin9919	Repeat 1	0	0	0.062037	0.116	0.12	0.119944
	Jin9919	Repeat 2	0			0.123
	Jin9919	Repeat 3	0			0.121
189	H050	Repeat 1	0	0	0.015625	0	0	0.0152074
	H050	Repeat 2	0			0
	H050	Repeat 3	0			0
190	H172	Repeat 1	0	0	0	0.257	0.226333	0.226339
	H172	Repeat 2	0			0.219
	H172	Repeat 3	0			0.203
191	Lv983	Repeat 1	0.153	0.0766667	0.0634615	0.139	0.124667	0.124704
	Lv983	Repeat 2	0			0.107
	Lv983	Repeat 3	0.077			0.128
192	Sui706	Repeat 1	0.111	0.120667	0.120773	0.429	0.406333	0.406189
	Sui706	Repeat 2	0.131			0.393
	Sui706	Repeat 3	0.12			0.397
193	L201	Repeat 1	0.24	0.295667	0.348784	0.607	0.650333	0.650573
	L201	Repeat 2	0.357			0.648
	L201	Repeat 3	0.29			0.696
194	Sui707	Repeat 1	0.185	0.172	0.1875	0.2	0.196	0.195918
	Sui707	Repeat 2	0.156			0.184
	Sui707	Repeat 3	0.175			0.204
195	WBA31	Repeat 1	0.032	0.0236667	0.0310245	0.039	0.0336667	0.033726
	WBA31	Repeat 2	0.015			0.023
	WBA31	Repeat 3	0.024			0.039
196	Dong65003	Repeat 1	0.022	0.023	0.0227743	0.064	0.0633333	0.0632202
	Dong65003	Repeat 2	0.021			0.064
	Dong65003	Repeat 3	0.026			0.062
197	KS23	Repeat 1	0.052	0.048	0.0478632	0.075	0.079	0.0786252
	KS23	Repeat 2	0.044			0.074
	KS23	Repeat 3	0.048			0.088
198	HR0344	Repeat 1	0	0.0226667	0.0227273	0.059	0.059	0.0589898
	HR0344	Repeat 2	0.035			0.069
	HR0344	Repeat 3	0.033			0.049
199	T64	Repeat 1	0	0	0.0119048	0.024	0.023	0.0230159
	T64	Repeat 2	0			0.022
	T64	Repeat 3	0			0.023
200	T02	Repeat 1	0	0	0.00793651	0	0.00533333	0.00954301
	T02	Repeat 2	0			0
	T02	Repeat 3	0			0.016
201	HR774	Repeat 1	0	0	0.0272401	0.222	0.221	0.220648
	HR774	Repeat 2	0			0.212
	HR774	Repeat 3	0			0.229
202	HR113	Repeat 1	0.055	0.0293333	0.0526676	0.238	0.2215	0.232684
	HR113	Repeat 2	0			NA
	HR113	Repeat 3	0.033			0.205
203	HR701	Repeat 1	0.067	0.0643333	0.0878274	0.114	0.119667	0.119651
	HR701	Repeat 2	0.061			0.132
	HR701	Repeat 3	0.065			0.113
204	Sui709	Repeat 1	0	0	0.0106383	0	0	0.00959327
	Sui709	Repeat 2	0			0
	Sui709	Repeat 3	0			0
205	A14	Repeat 1	0.051	0.0493333	0.0494505	0.056	0.049	0.0488494
	A14	Repeat 2	0.047			0.047
	A14	Repeat 3	0.05			0.044
206	A4_227	Repeat 1	0.063	0.075	0.0747283	0.043	0.0463333	0.0465219
	A4_227	Repeat 2	0.087			0.045
	A4_227	Repeat 3	0.075			0.051
207	G249	Repeat 1	0	0	0.0104167	0.028	0.025	0.0249477
	G249	Repeat 2	0			0.023
	G249	Repeat 3	0			0.024
208	H270	Repeat 1	0.096	0.0916667	0.0915552	NA	0.0655	0.0651483
	H270	Repeat 2	0.089			0.063
	H270	Repeat 3	0.09			0.068
209	KL632	Repeat 1	0.057	0.0566667	0.0566038	0.269	0.238333	0.238362
	KL632	Repeat 2	0.055			0.208
	KL632	Repeat 3	0.058			0.238
210	T216	Repeat 1	0.227	0.218667	0.218596	0.235	0.237333	0.237148
	T216	Repeat 2	0.211			0.211
	T216	Repeat 3	0.218			0.266
211	DN_1_2	Repeat 1	0	0	0.0121951	NA	0.0765	0.0763593
	DN_1_2	Repeat 2	0			0.064
	DN_1_2	Repeat 3	0			0.089
212	Jia56_1	Repeat 1	0	0	0.00833333	0	0.00633333	0.00641026
	Jia56_1	Repeat 2	0			0
	Jia56_1	Repeat 3	0			0.019
213	Jia108	Repeat 1	0	0	0.0181878	0.133	0.137	0.136615
	Jia108	Repeat 2	0			0.157
	Jia108	Repeat 3	0			0.121
214	Jia113	Repeat 1	0.016	0.00966667	0.00961539	0.039	0.0423333	0.0420875
	Jia113	Repeat 2	0			0.056
	Jia113	Repeat 3	0.013			0.032
215	Jia069_3	Repeat 1	0.022	0.0256667	0.025817	0.125	0.145	0.144841
	Jia069_3	Repeat 2	0.029			0.167
	Jia069_3	Repeat 3	0.026			0.143
216	D5801	Repeat 1	0.022	0.0233333	0.0233062	0.039	0.031	0.0312519
	D5801	Repeat 2	0.025			0.027
	D5801	Repeat 3	0.023			0.027
217	DN139	Repeat 1	0.222	0.207667	0.207885	0.531	0.528	0.527778
	DN139	Repeat 2	0.194			0.523
	DN139	Repeat 3	0.207			0.53
218	T4312	Repeat 1	0	0	0.00649351	0.014	0.00466667	0.00462963
	T4312	Repeat 2	0			0
	T4312	Repeat 3	0			0
219	DN1722	Repeat 1	0	0	0.00961539	0	0.00433333	0.0042735
	DN1722	Repeat 2	0			0
	DN1722	Repeat 3	0			0.013
220	B73	Repeat 1	0.045	0.0466667	0.0469208	0.041	0.0496667	0.0456075
	B73	Repeat 2	0.048			0.064
	B73	Repeat 3	0.047			0.044
221	Ji818	Repeat 1	0	0	0.0703445	0.194	0.207667	0.128523
	Ji818	Repeat 2	0			0.194
	Ji818	Repeat 3	0			0.235
222	419	Repeat 1	0	0.009	0.00892857	0	0.00533333	0.00546448
	419	Repeat 2	0.018			0
	419	Repeat 3	0.009			0.016
223	4112	Repeat 1	0.027	0.0453333	0.0454284	0.187	0.167	0.166674
	4112	Repeat 2	0.064			0.165
	4112	Repeat 3	0.045			0.149
224	495	Repeat 1	0	0	0.00980392	0.014	0.0186667	0.0183018
	495	Repeat 2	0			0.013
	495	Repeat 3	0			0.029
225	LJ311	Repeat 1	0.442	0.460667	0.460514	0.714	0.682333	0.68254
	LJ311	Repeat 2	0.481			0.653
	LJ311	Repeat 3	0.459			0.68
226	LB371	Repeat 1	0	0.347	0.559959	0.257	0.255	0.477239
	LB371	Repeat 2	0.69			0.243
	LB371	Repeat 3	0.351			0.265
227	DH02	Repeat 1	0.667	0.619	0.47619	NA	0.3065	0.306122
	DH02	Repeat 2	0.575			0.286
	DH02	Repeat 3	0.615			0.327
228	Dan1324	Repeat 1	0	0	0.016129	0.028	0.036	0.0352345
	Dan1324	Repeat 2	0			0.031
	Dan1324	Repeat 3	0			0.049
229	M67	Repeat 1	0.028	0.03	0.0303993	0	0.00533333	0.00520833
	M67	Repeat 2	0.034			0.016
	M67	Repeat 3	0.028			0
230	Liao2309	Repeat 1	0	0	0.0239316	0.091	0.092	0.0917383
	Liao2309	Repeat 2	0			0.099
	Liao2309	Repeat 3	0			0.086
231	Tie9010	Repeat 1	0	0	0.0296296	NA	0.0655	0.0654966
	Tie9010	Repeat 2	0			0.068
	Tie9010	Repeat 3	0			0.063
232	Liao5114	Repeat 1	0.047	0.0473333	0.0470653	0.024	0.0286667	0.0287698
	Liao5114	Repeat 2	0.044			0.031
	Liao5114	Repeat 3	0.051			0.031
233	Dan599	Repeat 1	0.085	0.112333	0.0184746	0.271	0.322	0.126123
	Dan599	Repeat 2	0.14			0.368
	Dan599	Repeat 3	0.112			0.327
234	Dan99L_1	Repeat 1	0.017	0.00866667	0.00847458	0.039	0.034	0.0339963
	Dan99L_1	Repeat 2	0			0.031
	Dan99L_1	Repeat 3	0.009			0.032
235	Liao7990	Repeat 1	0.04	0.042	0.0422222	NA	0.0445	0.0448718
	Liao7990	Repeat 2	0.047			0.038
	Liao7990	Repeat 3	0.039			0.051
236	W9235	Repeat 1	0.061	0.054	0.0538681	0	0.00666667	0.00666667
	W9235	Repeat 2	0.051			0.02
	W9235	Repeat 3	0.05			0
237	Tie98042_1	Repeat 1	0.079	0.078	0.078252	0.101	0.110667	0.110792
	Tie98042_1	Repeat 2	0.073			0.111
	Tie98042_1	Repeat 3	0.082			0.12
238	M54	Repeat 1	0.04	0.0486667	0.0485714	0.107	0.110667	0.141149
	M54	Repeat 2	0.053			0.135
	M54	Repeat 3	0.053			0.164
239	S122	Repeat 1	0.03	0.0543333	0.0835913	0.136	0.125333	0.125326
	S122	Repeat 2	0.079			0.115
	S122	Repeat 3	0.054			0.125
240	AT801	Repeat 1	0.059	0.043	0.0564388	0.216	0.1975	0.197394
	AT801	Repeat 2	0.027			NA
	AT801	Repeat 3	0.043			0.179
241	Shen161	Repeat 1	0.519	0.549	0.549089	NA	0.7335	0.733654
	Shen161	Repeat 2	0.577			0.692
	Shen161	Repeat 3	0.551			0.775
242	TieT0759	Repeat 1	0.085	0.0903333	0.0904472	0.057	0.0613333	0.0926887
	TieT0759	Repeat 2	0.098			0.066
	TieT0759	Repeat 3	0.088			0.061
243	JH96B	Repeat 1	0	0	0.323529	0.186	0.183	0.330553
	JH96B	Repeat 2	0			0.176
	JH96B	Repeat 3	0			0.187
244	531	Repeat 1	0	0.021	0.0208333	0.018	0.02	0.0202001
	531	Repeat 2	0.043			0.023
	531	Repeat 3	0.02			0.019
245	Ji803	Repeat 1	0.091	0.0646667	0.0646853	0.152	0.127	0.126849
	Ji803	Repeat 2	0.038			0.129
	Ji803	Repeat 3	0.065			0.1
246	GKF	Repeat 1	0.037	0.028	0.0277778	0.014	0.0226667	0.0224869
	GKF	Repeat 2	0.021			0.03
	GKF	Repeat 3	0.026			0.024
247	KWCB1	Repeat 1	0.056	0.093	0.113248	0.104	0.096	0.096033
	KWCB1	Repeat 2	0.134			0.091
	KWCB1	Repeat 3	0.089			0.093
248	KWMM31	Repeat 1	0.075	0.0383333	0.0384615	0.188	0.160667	0.160281
	KWMM31	Repeat 2	0			0.132
	KWMM31	Repeat 3	0.04			0.162
249	HF12202	Repeat 1	0.083	0.083	0.0833333	0.262	0.254333	0.254152
	HF12202	Repeat 2	0.083			0.246
	HF12202	Repeat 3	0.083			0.255
250	PHRKB	Repeat 1	0.057	0.0533333	0.0533428	0.127	0.128	0.128389
	PHRKB	Repeat 2	0.054			0.13
	PHRKB	Repeat 3	0.049			0.127
251	PHJEV	Repeat 1	0.032	0.0543333	0.0543298	0.015	0.0145	0.0142023
	PHJEV	Repeat 2	0.082			0.014
	PHJEV	Repeat 3	0.049			NA
252	XY828F	Repeat 1	0.154	0.18	0.0544294	0.07	0.0653333	0.0716218
	XY828F	Repeat 2	0.206			0.059
	XY828F	Repeat 3	0.18			0.067
253	XY828M	Repeat 1	0.139	0.123333	0.179864	0.172	0.177667	0.177569
	XY828M	Repeat 2	0.112			0.188
	XY828M	Repeat 3	0.119			0.173
254	XY986F	Repeat 1	0.194	0.166667	0.0238095	0.273	0.264	0.0326389
	XY986F	Repeat 2	0.139			0.255
	XY986F	Repeat 3	0.167			0.264
255	XY986M	Repeat 1	0.047	0.0236667	0.16699	0.033	0.0326667	0.264023
	XY986M	Repeat 2	0			0.044
	XY986M	Repeat 3	0.024			0.021
256	KW4M029	Repeat 1	0.12	0.147667	0.1475	NA	0.1225	0.122636
	KW4M029	Repeat 2	0.172			0.139
	KW4M029	Repeat 3	0.151			0.106
257	KW7M031	Repeat 1	0.129	0.145	0.145161	0.429	0.4365	0.436508
	KW7M031	Repeat 2	0.156			NA
	KW7M031	Repeat 3	0.15			0.444
258	KW7M14	Repeat 1	0.165	0.172333	0.172482	0.292	0.271	0.270892
	KW7M14	Repeat 2	0.184			0.235
	KW7M14	Repeat 3	0.168			0.286
259	412	Repeat 1	0.08	0.0816667	0.0816667	0.167	0.145667	0.145585
	412	Repeat 2	0.086			0.119
	412	Repeat 3	0.079			0.151
260	7884	Repeat 1	0.023	0.023	0.0232558	0.043	0.043	0.0431863
	7884	Repeat 2	0.023			0.048
	7884	Repeat 3	0.023			0.038
261	Dan337	Repeat 1	0	0	0.0221342	0.294	0.3165	0.31655
	Dan337	Repeat 2	0			0.339
	Dan337	Repeat 3	0			NA
262	JH59	Repeat 1	0.4	0.3	0.316667	0.071	0.081	0.303264
	JH59	Repeat 2	0.2			0.091
	JH59	Repeat 3	0.3			0.081
263	465	Repeat 1	0	0	0.00943396	0.013	0.00933333	0.00924863
	465	Repeat 2	0			0.015
	465	Repeat 3	0			0
264	DianMo17	Repeat 1	0	0	0.00769231	0.014	0.015	0.0150716
	DianMo17	Repeat 2	0			0.017
	DianMo17	Repeat 3	0			0.014
265	Dong96	Repeat 1	0.175	0.183	0.183275	0.224	0.21	0.210214
	Dong96	Repeat 2	0.195			0.194
	Dong96	Repeat 3	0.179			0.212
266	Shen501	Repeat 1	0.047	0.061	0.0607558	0.341	0.344	0.34398
	Shen501	Repeat 2	0.076			0.354
	Shen501	Repeat 3	0.06			0.337
267	1028	Repeat 1	0.407	0.311667	0.311812	0.519	0.525	0.525205
	1028	Repeat 2	0.236			0.481
	1028	Repeat 3	0.292			0.575
268	Shen135	Repeat 1	0.384	0.410333	0.0731602	0.442	0.4155	0.113604
	Shen135	Repeat 2	0.457			NA
	Shen135	Repeat 3	0.39			0.389
269	H428_17	Repeat 1	0.167	0.190333	0.190476	0.175	0.196	0.196106
	H428_17	Repeat 2	0.204			0.205
	H428_17	Repeat 3	0.2			0.208
270	Mo113	Repeat 1	0.055	0.0543333	0.0544118	0.298	0.297	0.296703
	Mo113	Repeat 2	0.059			0.286
	Mo113	Repeat 3	0.049			0.307
271	NG5	Repeat 1	0.2	0.205333	0.205263	0.431	0.453333	0.453319
	NG5	Repeat 2	0.211			0.471
	NG5	Repeat 3	0.205			0.458
272	HD568	Repeat 1	0.224	0.212	0.212021	0.508	0.5145	0.51412
	HD568	Repeat 2	0.22			NA
	HD568	Repeat 3	0.192			0.521
273	11DM124	Repeat 1	0	0.012	0.0119048	0.051	0.059	0.0588184
	11DM124	Repeat 2	0.024			0.079
	11DM124	Repeat 3	0.012			0.047
274	He604	Repeat 1	0.109	0.105667	0.105566	0.221	0.2035	0.203247
	He604	Repeat 2	0.102			NA
	He604	Repeat 3	0.106			0.186
275	Ji6003	Repeat 1	0.141	0.143	0.143096	0.29	0.2785	0.278261
	Ji6003	Repeat 2	0.149			NA
	Ji6003	Repeat 3	0.139			0.267
276	D34	Repeat 1	0	0	0.0108696	0.015	0.0075	0.00746269
	D34	Repeat 2	0			0
	D34	Repeat 3	0			NA
277	Ming2325	Repeat 1	0.136	0.0776667	0.0776158	0.251	0.244	0.243939
	Ming2325	Repeat 2	0.016			0.235
	Ming2325	Repeat 3	0.081			0.246
278	F2001	Repeat 1	0.202	0.151667	0.151515	0.333	0.358	0.358081
	F2001	Repeat 2	0.091			0.341
	F2001	Repeat 3	0.162			0.4
279	Jing388	Repeat 1	0.044	0.033	0.0330918	0.087	0.091	0.091246
	Jing388	Repeat 2	0.022			0.083
	Jing388	Repeat 3	0.033			0.103
280	HTH17	Repeat 1	0.098	0.0496667	0.0914787	0.14	0.159	0.106431
	HTH17	Repeat 2	0			0.168
	HTH17	Repeat 3	0.051			0.169
281	HYS3	Repeat 1	0.125	0.199	0.282197	0.386	0.332333	0.363356
	HYS3	Repeat 2	0.263			0.333
	HYS3	Repeat 3	0.209			0.278
282	Cheng36	Repeat 1	0.136	0.069	0.0689655	0.05	0.05	0.0500313
	Cheng36	Repeat 2	0			0.051
	Cheng36	Repeat 3	0.071			0.049
283	20143	Repeat 1	0.124	0.229	0.229167	0.148	0.161	0.160556
	20143	Repeat 2	0.333			0.156
	20143	Repeat 3	0.23			0.179
284	Ji35	Repeat 1	0.063	0.0653333	0.0653409	0.333	0.32	0.33439
	Ji35	Repeat 2	0.063			0.344
	Ji35	Repeat 3	0.07			0.283
285	543	Repeat 1	0.222	0.205	0.204861	0.536	0.5755	0.575549
	543	Repeat 2	0.198			0.615
	543	Repeat 3	0.195			NA
286	Cheng60	Repeat 1	0.167	0.189	0.188596	0.286	0.254667	0.254751
	Cheng60	Repeat 2	0.209			0.235
	Cheng60	Repeat 3	0.191			0.243
287	Cheng53	Repeat 1	0.231	0.128667	0.233806	0.536	0.469333	0.46897
	Cheng53	Repeat 2	0.024			0.429
	Cheng53	Repeat 3	0.131			0.443
288	Ji815	Repeat 1	0.088	0.072	0.0722867	NA	0.2875	0.287631
	Ji815	Repeat 2	0.06			0.264
	Ji815	Repeat 3	0.068			0.311
289	Chong72	Repeat 1	0.244	0.263	0.262977	0.466	0.483	0.482759
	Chong72	Repeat 2	0.285			0.499
	Chong72	Repeat 3	0.26			0.484
290	NP01200	Repeat 1	0.167	0.175333	0.17517	0.212	0.224333	0.224192
	NP01200	Repeat 2	0.184			0.247
	NP01200	Repeat 3	0.175			0.214
291	PH6WC	Repeat 1	0.039	0.0466667	0.0467391	0.021	0.0185	0.0185748
	PH6WC	Repeat 2	0.05			NA
	PH6WC	Repeat 3	0.051			0.016
292	PH4CV	Repeat 1	0	0	0.0217391	0.074	0.0843333	0.0843102
	PH4CV	Repeat 2	0			0.094
	PH4CV	Repeat 3	0			0.085
