# Supplementary material for: Genome-wide association study identifies ZmMYB42 as a candidate gene for resistance to maize head smut
Source: Research Square preprint supplement (doi:10.21203/rs.3.rs-5898765/v1), 2025-04-23
Supplement: Supplementary file 9 [file ce2b986497ff242869b29a04.xlsx]

## Sheet: Sheet1
Table S9 Primers were used for the quantification of seven candidate genes
Gene	Forward primer（5'-3'）	Reverse primer（5'-3'）
Zm00001d053220	CGACCACCATCTCGTTCCAG	TGATGCAGAGGTCCAGGTTG
Zm00001d053223	AGACGTGATTCGTCGGTGTG	CCCAGAGTATGTCCCCCTGA
Zm00001d053225	GTTCAGGACAAACAACGAGCCA	AACGCCGCTTCCAAATGC
Zm00001d053228	TCCTCCGCCTGCAACCA	CAGCGAATCCGCACCAAG
Zm00001d017274	CGGTGTCAGCCCCTGCCT	AAGCCGCCCTCGATGCC
Zm00001d017275	GCCTCCCGTCCAACCTGTCC	TGCCTCGGCGGTCTTCCTG
Zm00001d017276	GTGGCTTGGCCCACAGATTGA	GATGGCTGCGATGGCGAGA
Actin	GTTGGGCGTCCTCGTCA3	TGGGTCATCTTCTCCCTGTT
