# Supplementary material for: Genome-wide association study identifies ZmMYB42 as a candidate gene for resistance to maize head smut
Source: Research Square preprint supplement (doi:10.21203/rs.3.rs-5898765/v1), 2025-04-23
Supplement: Supplementary file 10 [file d41e4f21e13b3d3e0cf8f4be.xlsx]

## Sheet: Sheet2
Table S6 Information on SNPs related to head smut resistance in 292 maize inbred lines
SNP	Year	Chr	Position	-log10P	Allele
SNP98887853	2022	1	98887853	3.81	G/A
SNP229783712	2022	2	229783712	6.24	C/T
SNP59037887	2022	3	59037887	3.69	G/A
SNP227433374	2022	3	227433374	3.56	G/A
SNP191418784	2022	5	191418784	6.65	A/T
SNP172716300	2022	6	172716300	3.69	C/T
SNP89540028	2022	7	89540028	4.57	G/A
SNP97795165	2022	7	97795165	4.49	G/A
SNP97887364	2022	7	97887364	3.88	G/A
SNP90506222	2022	7	90506222	3.73	C/T
SNP88742353	2022	7	88742353	3.61	G/A
SNP97698988	2022	7	97698988	3.57	C/T
SNP170343810	2022	8	170343810	3.95	T/G
SNP230557995	2023	2	230557995	4.69	T/A
SNP10504187	2023	2	10504187	3.88	C/T
SNP27992930	2023	2	27992930	3.50	A/G
SNP220821587	2023	4	220821587	3.63	A/C
SNP191418784	2023	5	191418784	3.62	A/T
SNP114529371	2023	6	114529371	3.50	T/C
SNP170343810	2023	8	170343810	4.33	T/G
SNP45884266	2023	10	45884266	4.24	A/G
SNP230557995	Average of 2022 and 2023	2	230557995	5.07	T/A
SNP229783712	Average of 2022 and 2023	2	229783712	4.44	C/T
SNP238190538	Average of 2022 and 2023	2	238190538	3.97	T/C
SNP233751750	Average of 2022 and 2023	2	233751750	3.58	C/T
SNP233788969	Average of 2022 and 2023	2	233788969	3.58	C/T
SNP220821587	Average of 2022 and 2023	4	220821587	4.05	A/C
SNP27715467	Average of 2022 and 2023	4	27715467	3.85	A/C
SNP220781877	Average of 2022 and 2023	4	220781877	3.75	T/C
SNP190812614	Average of 2022 and 2023	5	190812614	3.97	C/T
SNP191418784	Average of 2022 and 2023	5	191418784	3.74	A/T
SNP170343810	Average of 2022 and 2023	8	170343810	4.43	T/G
