# Supplementary material for: Genome-wide association study identifies ZmMYB42 as a candidate gene for resistance to maize head smut
Source: Research Square preprint supplement (doi:10.21203/rs.3.rs-5898765/v1), 2025-04-23
Supplement: Supplementary file 11 [file d6df04dc7a0a484f4c32be26.xlsx]

## Sheet: Sheet1
Table S10 Flowering time of 292 maize inbred lines
Inbred lines	flowering time
ZhongM_8	8.5
L237	8.10
Ying64	7.31
DG11A	7.27
Dong237	7.30
1134	7.20
K10	7.20
LK11	8.2
KL3	8.5
Long53	8.2
Fu706	7.27
He344	7.28
Dong6002	8.6
Ji846	8.2
KL2	7.23
KL6	8.5
D3_1	8.6
HR30	7.16
KWS10_73	7.18
KWS49	7.20
Jia33	7.25
Jia28	7.31
KW5G321	8.10
KW1A139	7.22
H1208	8.10
He344_1	8.2
L203	7.30
81162	8.6
8638	8.7
833	8.5
9F592	8.6
6F576	7.29
KL613	7.25
385_1	8.2
HA25	7.20
KL45	7.18
Ji63	7.27
Xi14	8.7
Mo17	8.10
ZaC546	7.25
70_104	8.5
L105	8.2
446	7.30
Ji853	8.4
434	7.27
4F1	8.2
444	8.5
Ji002	7.29
S8_101	8.10
7922	8.9
7884_7Ht	8.2
96478	8.2
Ji992	8.7
Ji1037	8.5
Si_287	8.5
W9706	8.5
8902	8.5
Cheng351	8.2
D22	8.6
KX	8.7
Ji046	7.29
Dan598	7.31
XF	7.29
634150	8.10
TM	7.28
M407	7.29
F62	7.26
Dan340	8.6
Cheng18	8.7
Si144	8.1
HYM	7.25
Mo17Ht	7.26
Shen5003	7.25
KYC8605	8.5
7_61	8.7
Liao2345	8.2
8112	7.31
Liao1412	8.8
LD175_1	8.5
D26	7.29
Dan3130	8.6
A801	8.10
Liao68	8.8
LIao3180	8.7
K12	8.9
Shen151	8.8
Dan717	8.6
Zheng22	8.1
Liao3162	7.29
PH09B	8.8
PHPMO	8.1
Dan988	8.1
DanT138	7.28
Liao6082	7.29
7017	8.2
Dan99C	7.26
Shen3336	8.9
Shen3265	7.20
Dan360	7.30
CL143	8.6
PH6JM	8.7
Dan6263	7.30
C260	7.28
C168	7.27
Liao7980	8.1
F12	8.2
K0325	8.10
2511A	7.28
Z3_87	8.5
M60	8.1
K3841	8.5
SD7928	7.30
SD8738	7.30
Shen3117	7.26
Dan37	7.27
M03	7.28
M5972	7.30
Ming84	8.1
Ming71	7.28
TieT0403	7.30
M53	7.26
S127	7.29
Shen391	8.3
Shen8078	7.30
Tie84	8.7
Lv9W	9.1
9137	8.1
391	7.18
XKZA34	7.17
XKZ167_1	7.22
GLMo17	8.7
JZL610	8.7
Chang7_2	8.8
KH786	8.1
KH467	8.1
773_2G	7.30
917	7.30
Hei2	8.15
K454	7.17
M502	7.30
7857	8.3
Xin444	8.1
Zong31	8.5
P138	8.8
Zhong451	8.2
ZZ01	7.24
HZS	8.9
5213	8.2
CN165	7.30
CN4379	8.1
YFH	8.7
F349	8.5
P25	8.5
Qi205	7.30
CA375	7.30
Jing501	7.31
Jing24	7.30
Jing89	8.8
Jing572	8.9
NH60	8.1
Jing92	8.10
Jing725	8.8
Aijing525	8.12
XL21	8.8
7010	8.7
Chang3	7.22
oh43Ht	7.22
Hai014	7.29
Dong91	7.29
169	7.27
81_5	7.30
5003_1	8.10
Dong8112	7.28
Long69	7.26
52106	8.7
94_24	8.8
Sui601	7.30
Sui701	7.30
Dong5416	7.30
HR10	7.22
HR0110	7.23
HR118	7.22
T9	7.20
A22	7.30
T116	8.2
Jiang134	8.8
Jin9923	7.29
Jin9919	8.1
H050	8.15
H172	8.8
Lv983	7.30
Sui706	8.1
L201	7.24
Sui707	7.19
WBA31	7.29
Dong65003	7.30
KS23	7.29
HR0344	7.28
T64	7.30
T02	7.30
HR774	7.18
HR113	7.20
HR701	7.17
Sui709	7.28
A14	7.29
A4_227	7.28
G249	8.1
H270	8.3
KL632	7.29
T216	7.17
DN_1_2	7.29
Jia56_1	7.27
Jia108	8.8
Jia113	7.22
Jia069_3	7.25
D5801	8.8
DN139	8.7
T4312	7.31
DN1722	7.30
B73	8.1
Ji818	8.8
419	8.8
4112	8.5
495	8.7
LJ311	8.8
LB371	8.3
DH02	8.4
Dan1324	8.7
M67	7.30
Liao2309	8.5
Tie9010	8.3
Liao5114	8.5
Dan599	8.5
Dan99L_1	8.15
Liao7990	7.30
W9235	8.8
Tie98042_1	8.1
M54	7.30
S122	7.1
AT801	8.7
Shen161	8.8
TieT0759	7.30
JH96B	8.1
531	8.8
Ji803	8.10
GKF	7.15
KWCB1	8.1
KWMM31	7.30
HF12202	7.29
PHRKB	8.5
PHJEV	8.5
XY828F	8.10
XY828M	8.10
XY986F	8.10
XY986M	8.10
KW4M029	8.1
KW7M031	8.1
KW7M14	8.1
412	8.5
7884	7.23
Dan337	8.8
JH59	8.5
465	7.30
DianMo17	7.18
Dong96	7.29
Shen501	7.29
1028	7.28
Shen135	7.29
H428_17	8.8
Mo113	7.30
NG5	8.5
HD568	8.1
11DM124	7.30
He604	7.29
Ji6003	8.9
D34	8.8
Ming2325	8.1
F2001	7.1
Jing388	8.5
HTH17	8.8
HYS3	8.1
Cheng36	8.1
20143	8.1
Ji35	7.29
543	8.1
Cheng60	8.5
Cheng53	8.1
Ji815	8.2
Chong72	8.8
NP01200	7.29
PH6WC	8.7
PH4CV	8.8
