# Supplementary material for: Genome-wide association study identifies ZmMYB42 as a candidate gene for resistance to maize head smut
Source: Research Square preprint supplement (doi:10.21203/rs.3.rs-5898765/v1), 2025-04-23
Supplement: Supplementary file 12 [file f7e18a6205906576396a65a9.xlsx]

## Sheet: Sheet1
Table S5 Maize inbred lines and their taxa
Number	Lines	Disease resistance rating	Groups	Remark
1	PH09B	R	BSSS	M
2	PH6JM	HR	BSSS	M
3	7857	MR	BSSS	M
4	Qi 205	MR	BSSS	M
5	T4312	HR	BSSS	M
6	B73	R	BSSS
7	PH4CV	MR	BSSS
8	Fu 706	S	BSSS
9	Liao 3162	R	BSSS
10	KL6	S	BSSS
11	11DM124	R	BSSS
12	SD7928	R	BSSS
13	WBA31	R	BSSS
14	634150	MR	BSSS
15	PHJEV	R	BSSS
16	KH786	R	BSSS
17	KW4M029	S	BSSS
18	Xianyu 986♀	S	BSSS
19	XF	MR	BSSS	M
20	Liao 3180	R	BSSS	M
21	XL21（D1798Z）	HS	BSSS	M
22	Liao 2345	S	BSSS	M
23	Xianyu 828♂	MR	BSSS	M
24	F2001	S	BSSS	M
25	4-287	R	Iodent	M
26	Liaoju311	HS	Iodent	M
27	SD8738	S	Iodent	M
28	NH60	R	Iodent	M
29	Shen 391	MR	Iodent	M
30	Ying 64	HS	Iodent	M
31	Tie 0255-1	S	Iodent	M
32	PH6WC	R	Iodent	M
33	PHRKB	MR	Iodent	M
34	M60	MR	Iodent	M
35	M502	S	Iodent	M
36	L105	S	Iodent	M
37	M03	MR	Iodent	M
38	PHPMO	S	Iodent	M
39	M407	MR	Iodent	M
40	Jing 725	S	Iodent	M
41	Liangyu M53	S	Iodent	M
42	S122	S	Iodent	M
43	Jin9923	S	Iodent	M
44	KW7M031	S	Iodent	M
45	Jing 92	HS	Iodent	M
46	Longkang 11	R	Lan	M
47	He 344	HR	Lan	M
48	4F1	HR	Lan	M
49	KX	HR	Lan	M
50	Mo17Ht	R	Lan	M
51	7017	S	Lan	M
52	z3-87	S	Lan	M
53	Dan 37	R	Lan	M
54	Gailiang Mo17	HR	Lan	M
55	5213	MR	Lan	M
56	Sui 701	R	Lan	M
57	HR0344	R	Lan	M
58	T02	HR	Lan	M
59	HR774	S	Lan	M
60	Suixi 709	R	Lan	M
61	A14	R	Lan	M
62	DN-1-2	R	Lan	M
63	DN1722	HR	Lan	M
64	495	R	Lan	M
65	Danhuang 02	S	Lan	M
66	Dan 1324	R	Lan	M
67	Dan 337	S	Lan	M
68	465	HR	Lan	M
69	Mo17	R	Lan	M
70	W9706	HR	Lan	M
71	419	HR	Lan	M
72	Ji 853	S	Lan	M
73	4-144	MR	Lan	M
74	Ji 846	MR	Lan	M
75	Ji 992	R	Lan	M
76	KH467	MR	Lan	M
77	K454	R	Lan	M
78	Jiang 134	MR	Lan	M
79	HR30	MR	Lan	M
80	Ji 1037	HR	Lan	M
81	T116	MR	Lan
82	6F576	S	Lan	M
83	412	S	Lan	M
84	Jia 28	MR	Lan	M
85	1134	R	Lan	M
86	Huotanghuang 17	MR	Lan
87	Sheng 3265	S	Lan	M
88	A22	MR	Lan
89	KL2	MR	Lan
90	Zheng 22	S	Lan	M
91	HF12202	S	Lan	M
92	He 344-1	S	Lan	M
93	385-1	MR	LRC	M
94	Dan 360	MR	LRC	M
95	Ming 84	R	LRC	M
96	Jia 108	MR	LRC	M
97	Jia 069-3	MR	LRC	M
98	Ji 803	MR	LRC	M
99	D34	HR	LRC	M
100	Zong 31	HR	LRC	M
101	Xianyu 986♂	R	LRC	M
102	81162	MR	LRC	M
103	D5801	R	LRC	M
104	Dong 5416	S	LRC	M
105	Dan 340	MR	LRC	M
106	446	MR	LRC	M
107	M54	MR	LRC	M
108	Tie 84	S	LRC	M
109	Sheng 151	MR	LRC	M
110	F62	S	LRC	M
111	Tie T0759	MR	LRC
112	Liangyu S127	S	LRC
113	Huangzao4	HS	LRC	M
114	oh43Ht	S	LRC	M
115	F349	S	LRC	M
116	K3841	S	LRC
117	Suixi 707	S	LRC	M
118	Chengxi 36	MR	LRC	M
119	Sheng 8078	MR	LRC	M
120	Chong 72	S	LRC	M
121	Tie 9010	R	LRC	M
122	Liaobai 371	HS	LRC	M
123	Huang 428-17	S	LRC	M
124	Zhong M-8	R	PA	M
125	F12	S	PA	M
126	Xingzikenai 34	S	PA
127	Xingziken 167-1	R	PA
128	Jinzi L610	R	PA	M
129	T9	HR	PA	M
130	Jin 9919	MR	PA	M
131	CL143	R	PA	M
132	9137	MR	PA	M
133	D22	S	PA	M
134	Dan T138	R	PA	M
135	L203	MR	PA	M
136	D3-1	S	PA	M
137	8902	HS	PA	M
138	Liao 5114	R	PA	M
139	Jing 388	MR	PA	M
140	Jing 89	S	PA	M
141	531	R	PA	M
142	Liao 7980	S	PA	M
143	HR118	R	PA	M
144	Dan 6263	S	PA	M
145	Yi 35	S	PA	M
146	Ji 046	MR	PA	M
147	Dong 8112	S	PA	M
148	4112	S	PA	M
149	Chengxi 53	S	PA	M
150	Jing 572	HS	X	M
151	CA375	S	PA	M
152	5003-01-01	S	PA	M
153	AT801	S	PA
154	Ming 2325	S	PA	M
155	C260	S	PA	M
156	8112	S	PA	M
157	Dan 717	S	PA	M
158	Liao 6082	S	PA	M
159	Ji 815	S	PA
160	Lv 983	MR	PA
161	A801	R	PA	M
162	543	S	PA	M
163	96478	S	PA	M
164	L201	HS	PA	M
165	D26	S	PA	M
166	7922	S	PA	M
167	8638	S	PA	M
168	Shen 5003	HS	PA	M
169	917	R	PA
170	2511A	HS	PB
171	L237	R	PB	M
172	833	MR	PB	M
173	Liao 68	MR	PB	M
174	Dan 988	R	PB	M
175	Jinhuang 96B	S	PB
176	CN4379	S	PB	M
177	P138	HR	PB	M
178	Liao 7990	R	PB	M
179	Dan 99L-1	R	PB	M
180	Zhongzi 01	S	PB	M
181	K12	HS	PB	M
182	Ji 002	R	PB	M
183	Dan 3130	S	PB	M
184	Liao 2309	MR	PB	M
185	Tie 98042-1	MR	PB
186	Shen 501	S	PB
187	Dan 599	MR	PB	M
188	Jing 501	S	PB	M
189	Dan 598	S	PB	M
190	Chengxi 60	S	PB	M
191	Shen 3336	S	PB	M
192	P25	HS	PB	M
193	M5972	HS	PB	M
194	Jinhuang 59	S	PB	M
195	Shen 135	MR	SPT	M
196	Xin 444	HR	SPT	M
197	Longxi 69	S	SPT	M
198	T64	R	SPT	M
199	Chang 3	HS	SPT	M
200	Heixi 2	S	SPT	M
201	Dong 91	S	SPT	M
202	W9235	R	SPT	M
203	Tie T0403	S	SPT	M
204	K0325	S	SPT	M
205	94-24	S	SPT	M
206	Dong 237	S	SPT	M
207	TM	S	SPT	M
208	DN139	S	SPT	M
209	444	S	SPT	M
210	Huangyesi 3	S	SPT	M
211	HD568	S	SPT	M
212	Ming 71	HS	SPT
213	⑦-61	S	SPT
214	Dong 6002	HS	SPT
215	Chang 7-2	HS	SPT
216	Shen 161	HS	SPT
217	773-2G	S	X
218	KW5G321	R	X
219	Diangu 11A	R	X	M
220	H1208	HR	X	M
221	HA25	R	X	M
222	Kuanye C8605	R	X	M
223	Sui 601	R	X
224	C168	S	X	M
225	Jing 24	S	X	M
226	HR10	R	X	M
227	H050	R	X	M
228	G249	R	X	M
229	Jia 56-1	HR	X	M
230	Ji 818	MR	X	M
231	Dianmo 17	R	X	M
232	H172	S	X
233	NP01200	S	X	M
234	NG5	S	X	M
235	(KWS10×KWS73)	MR	X	M
236	Ji 63	R	X	M
237	KW1A139	HR	X	M
238	HR0110	MR	X	M
239	Dong 65003	R	X	M
240	7884	R	X	M
241	Hongyumi	R	X	M
242	Jia 113	R	X	M
243	Cheng 351	S	X	M
244	7010	MR	X	M
245	7884-7Ht	R	X	M
246	Za C546	R	X	M
247	KL632	S	X	M
248	29707	S	X
249	HR113	S	X	M
250	Xi 14	MR	X	M
251	Yuanfuhuang	S	X
252	K10	MR	X	M
253	Aijing525	HS	X
254	LD175-1	S	X	M
255	M67	R	X	M
256	Gaoke ♀	R	X	M
257	Sheng 3117	MR	X	M
258	Liao 1412	S	X	M
259	KWMM31	MR	X	M
260	A4-227	MR	X	M
261	Hai 014	S	X
262	KL613	S	X	M
263	70-104	S	X	M
264	KL3	R	X	M
265	HR701	S	X	M
266	KS23	MR	X	M
267	Xianyu 828♀	S	X	M
268	Mo113	S	X
269	S8-101	MR	X	M
270	Chengxi 18	MR	X	M
271	Zhong 451	S	X	M
272	KL45	S	X	M
273	52106	R	X	M
274	391	MR	X	M
275	Sui 706	S	X	M
276	H270	MR	X	M
277	Longxi 53	S	X	M
278	Jia 33	S	X	M
279	169	S	X	M
280	20143	S	X	M
281	Hexi 604	S	X	M
282	Dong 96	S	X	M
283	KWCB1	S	X	M
284	KW7M14	S	X	M
285	Ji 6003	S	X
286	9F592	HS	X	M
287	1028	HS	X	M
288	Lv9kuan	S	X	M
289	T216	S	X
290	CN165	S	X	M
291	434	S	X	M
292	KWS49	S	X
Note：LRC: Lvda Red Cob Group，SPT: Tang Sipingtou Group，Lan: Lancaster Group，PA group，PB: two subgroups of Reid Yellow Dent，BSSS: Iowa Stiff Stalk Synthetic，Iodent: Pioneer Hi-Bred, X: North China Germplasm Group. M represents the material for molecular marker development validation
