# Supplementary material for: Genome-wide association study identifies ZmMYB42 as a candidate gene for resistance to maize head smut
Source: Research Square preprint supplement (doi:10.21203/rs.3.rs-5898765/v1), 2025-04-23
Supplement: Supplementary file 13 [file f92b810d7696f7e704a1f3e8.xlsx]

## Sheet: Sheet1
Table S4 Correlation analysis between head smut incidence and flowering time in 292 maize inbred lines
	Correlation	Average incidence	Flowering time
Pearson Correlation	Average incidence	1	0.108273
Significance (two-tailed)			0.0646507
Pearson Correlation	Flowering time	0.108273	1
Significance (two-tailed)		0.0646507
