# Supplementary figures and images for: Genome-wide association study identifies ZmMYB42 as a candidate gene for resistance to maize head smut
Source: Research Square preprint supplement (doi:10.21203/rs.3.rs-5898765/v1), 2025-04-23

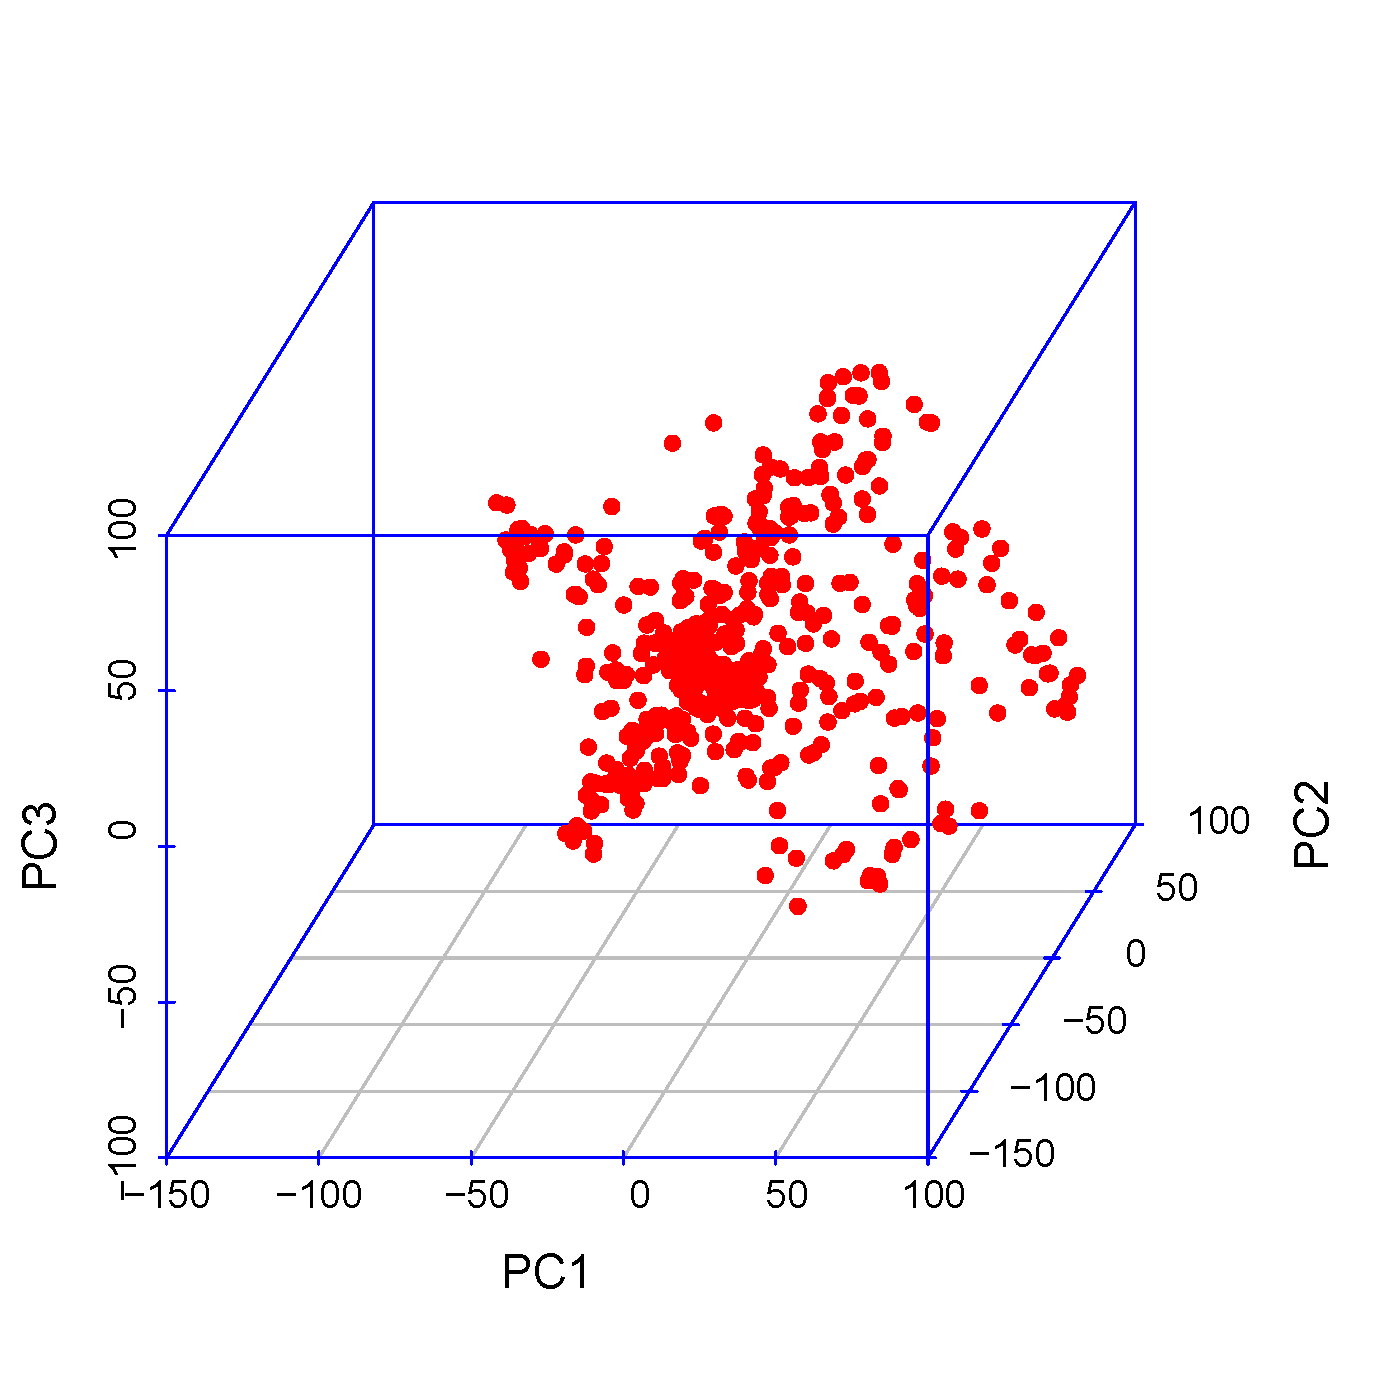


Fig S2. Principal Component Analysis (PCA) plot

Supplement: Supplementary file 5 [file 5d1c3b58dd1abc73b8ee8a82.docx]

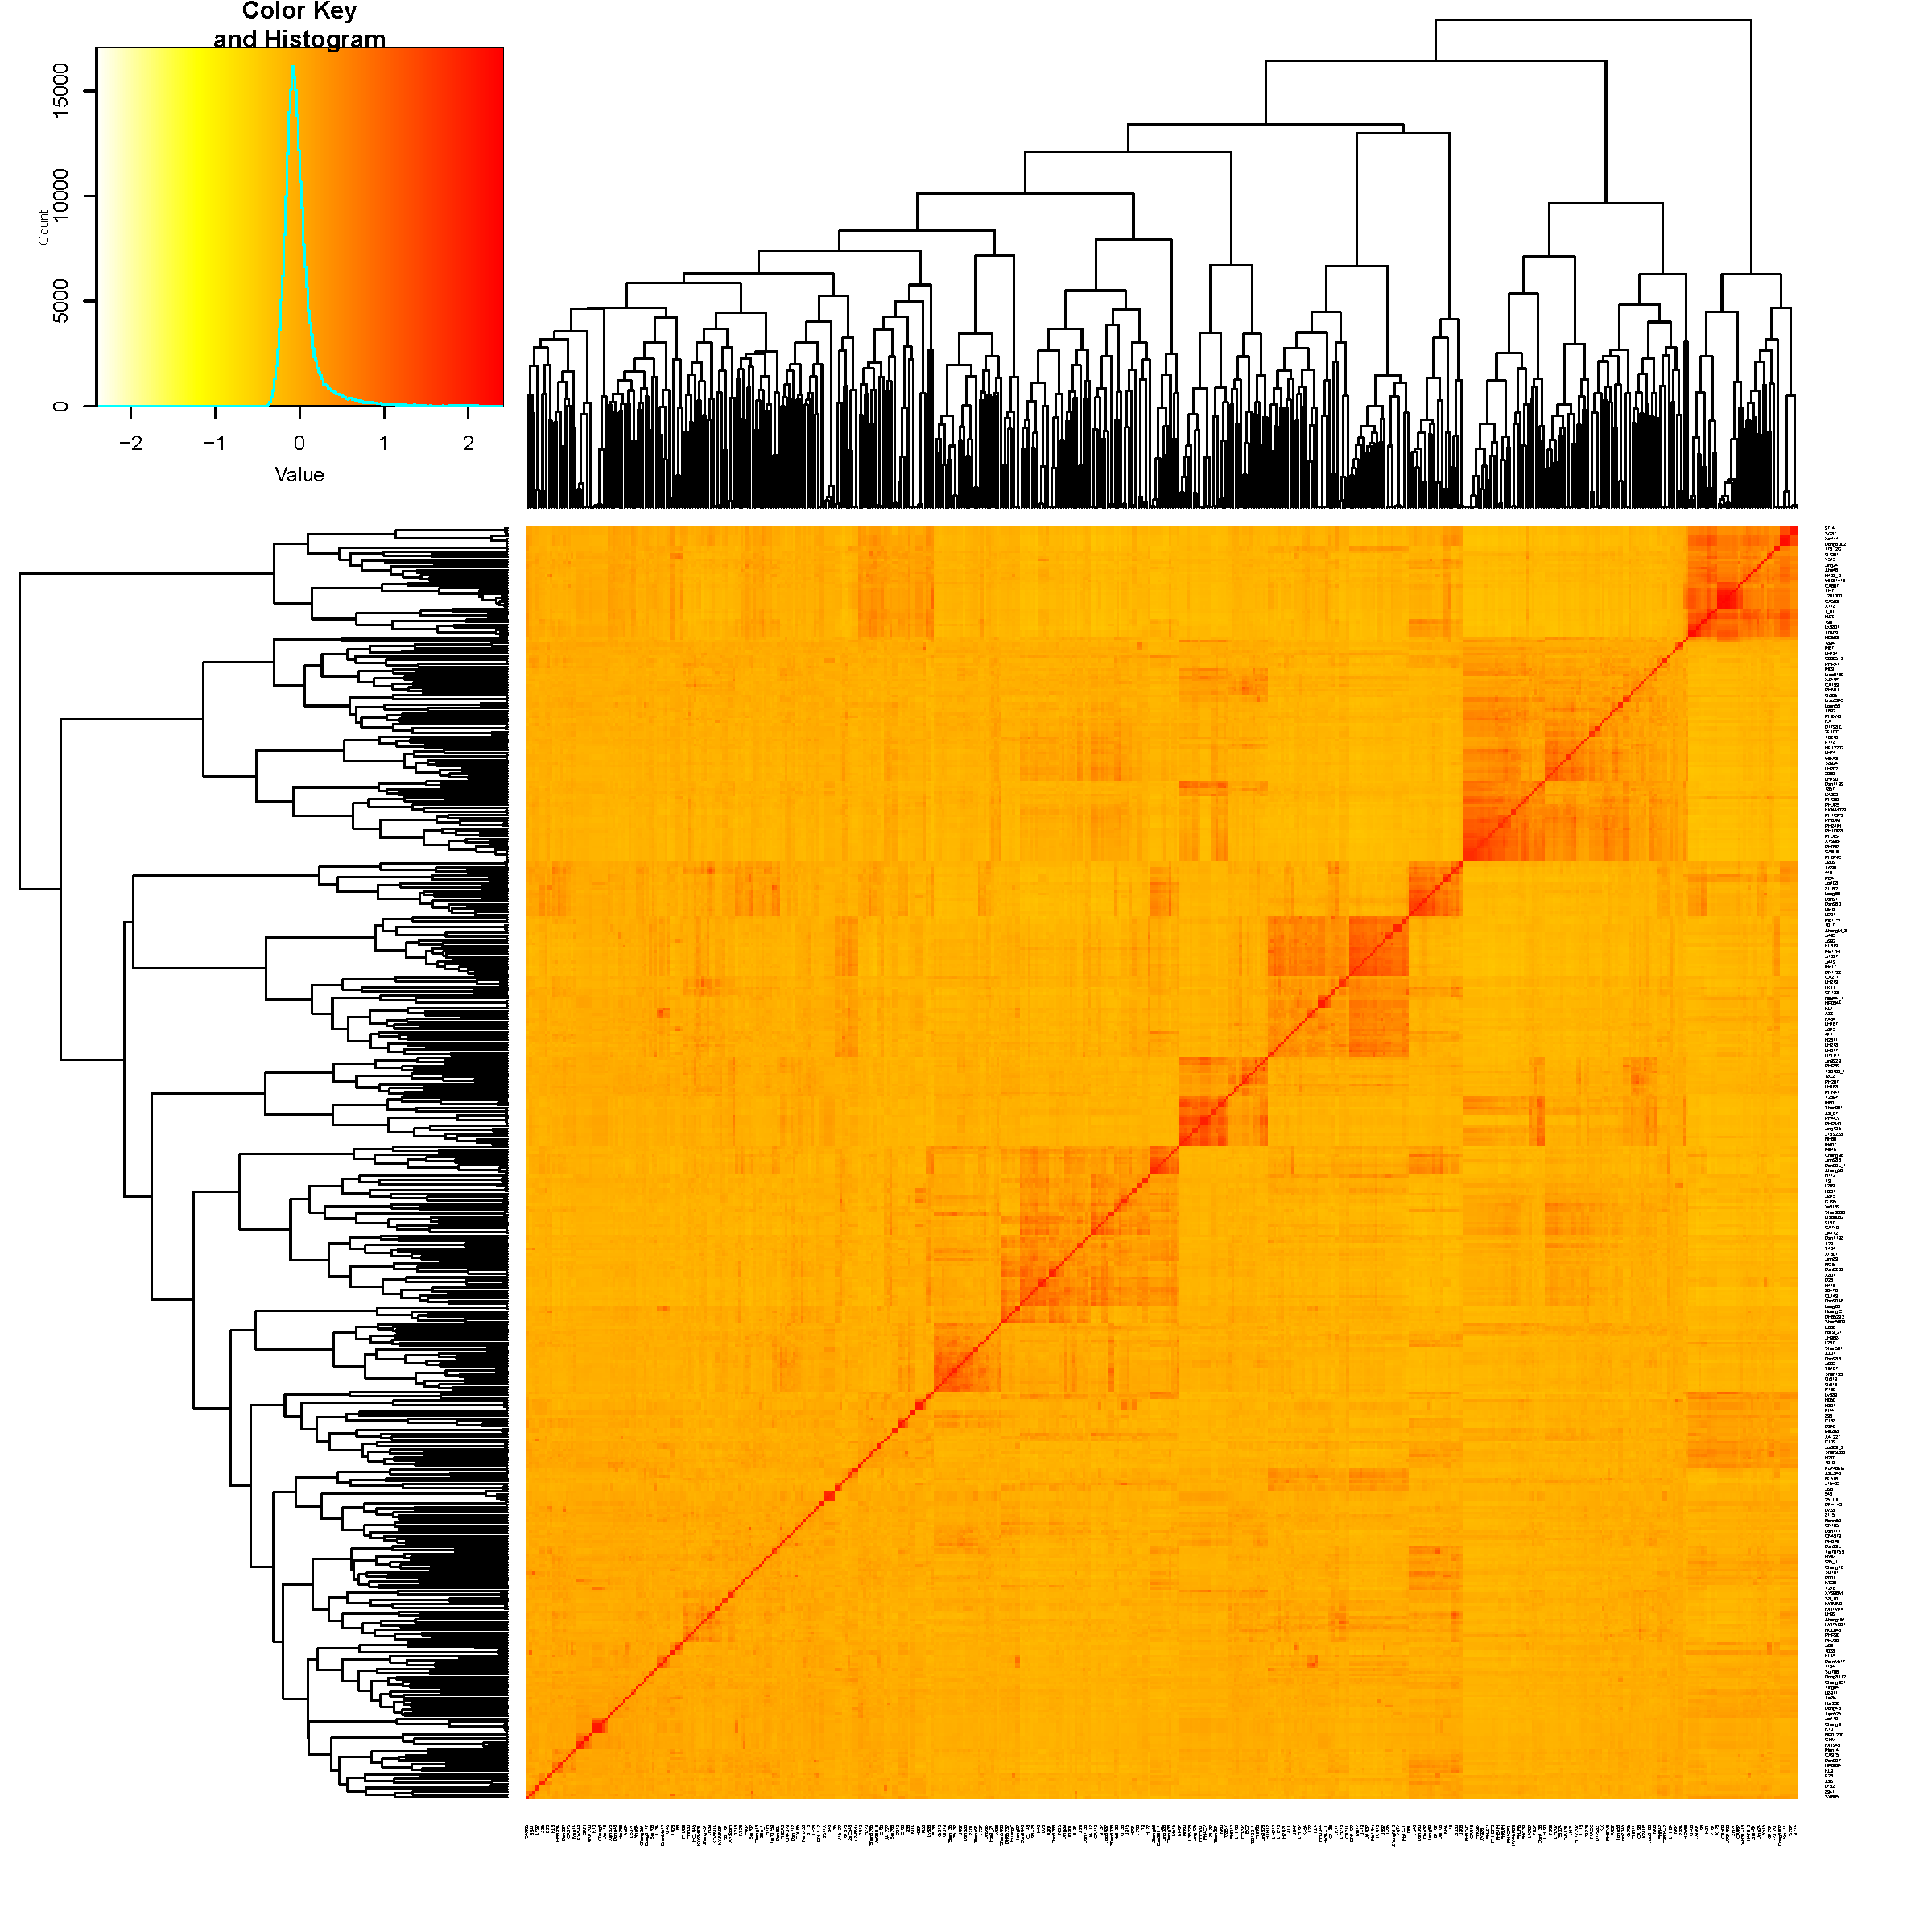


Fig S1. The kinship matrix (K) of maize inbred lines

Supplement: Supplementary file 8 [file c53f04affef9a6173dff5f4a.docx]
